# Supplementary material for: Risk of Hepatocellular Carcinoma With Tenofovir vs Entecavir Treatment for Chronic Hepatitis B Virus: A Reconstructed Individual Patient Data Meta-analysis
Source: PubMed Central journal article supplement (PMC9244612; doi:10.1001/jamanetworkopen.2022.19407), 2022-06-29
Supplement: jamanetwopen-e2219407-s001.pdf [file jamanetwopen-e2219407-s001.pdf]

## Supplementary Online Content

Tan DJH, Ng CH, Tay PWL, et al. Risk of hepatocellular carcinoma with tenofovir vs entecavir treatment for chronic hepatitis B virus: a reconstructed individual patient data meta-analysis. *JAMA Netw Open*. 2022;5(6):e2219407. doi:10.1001/jamanetworkopen.2022.19407

**eMethods.** Search Strategy for Embase and Medline Databases

**eTable 1.** Summary of Included Articles

**eFigure 1.** Reconstructed Survival Curves

**eFigure 2.** Assessment of Publication Bias

**eTable 2.** Restricted Mean Survival Time (RMST) Analysis of HCC Incidence in Patients Treated With Tenofovir vs Entecavir

**eFigure 3.** Cumulative Incidence of HCC in Patients Receiving Tenofovir vs Entecavir in Patients With Cirrhosis Only

**eFigure 4.** Cumulative Incidence of HCC in Patients Receiving Tenofovir vs Entecavir in (A) Single Centre Studies and in (B) Multicentre Studies

**eFigure 5.** Cumulative Incidence of HCC in Patients Receiving Tenofovir vs Entecavir in Studies Involving Treatment-Naïve Patients Only

**References.**

This supplementary material has been provided by the authors to give readers additional information about their work.

**eMethods.** Search Strategy for Embase and Medline Databases

**Embase**

1: ('liver neoplasm\*' or 'liver cancer\*' or 'hepatic neoplasm\*' or 'hepatic cancer\*' or 'hepatocellular carcinoma' or 'hepatocellular cancer\*' or hcc):ti,ab or 'liver neoplasms'/exp

2: 'Hepatitis B'/exp or ('Hepatitis B' or HBV):ti,ab

3: (entecavir or tenofovir or (nucleoside or nucleotide)):ti,ab

4: 1 and 2 and 3

**Medline**

1: ('liver neoplasm\*' or 'liver cancer\*' or 'hepatic neoplasm\*' or 'hepatic cancer\*' or 'hepatocellular carcinoma' or 'hepatocellular cancer\*' or hcc).ti,ab. or exp liver neoplasms/

2: exp Hepatitis B/ or ('Hepatitis B' or HBV).ti,ab.

3: (entecavir or tenofovir or (nucleoside or nucleotide)).ti,ab.

4: 1 and 2 and 3

eTable 1. Summary of Included Articles

| Name, year                    | Country or Region | Study Scale                                                                                             | Drug                                       | Number of Participants                                                                                                                                           | Mean or Median age, years                                                                                                                                                                                                                            | Male Participants (%)                                                                                                                                                                                             | Female Participants (%)                                                                                                                                                                                          | Previous nucleos(t)ide analogue treatment (%) | Cirrhosis (%)                                                                                                                                                                                                     | Follow up, months (median (IQR) or mean (SD))                                                                                                                                                                               | HCC occurrence                                                                                                                             | Factors included in PS model                                                                                                                                                           | Results reported in study (Entecavir as reference group)                        | NOS score |
|-------------------------------|-------------------|---------------------------------------------------------------------------------------------------------|--------------------------------------------|------------------------------------------------------------------------------------------------------------------------------------------------------------------|------------------------------------------------------------------------------------------------------------------------------------------------------------------------------------------------------------------------------------------------------|-------------------------------------------------------------------------------------------------------------------------------------------------------------------------------------------------------------------|------------------------------------------------------------------------------------------------------------------------------------------------------------------------------------------------------------------|-----------------------------------------------|-------------------------------------------------------------------------------------------------------------------------------------------------------------------------------------------------------------------|-----------------------------------------------------------------------------------------------------------------------------------------------------------------------------------------------------------------------------|--------------------------------------------------------------------------------------------------------------------------------------------|----------------------------------------------------------------------------------------------------------------------------------------------------------------------------------------|---------------------------------------------------------------------------------|-----------|
| Hsu et al, <sup>1</sup> 2020  | USA and Asia      | Multicentre; international                                                                              | Entecavir vs tenofovir disoproxil fumarate | Before matching: (4837 vs 700); After matching: (520 vs 520)                                                                                                     | Before matching: 50.8 (0.2) vs 45.7 (0.5); After matching: 44.1 (0.5) vs 44.9 (0.6)                                                                                                                                                                  | Before matching: 3328 (68.8%) vs 456 (65.1%); After matching: 354 (68.1%) vs 338 (65.0%)                                                                                                                          | Before matching: 1509 (31.2%) vs 244 (34.9%); After matching: 166 (31.9%) vs 182 (35.0%)                                                                                                                         | Naive                                         | Before matching: 1344 (27.8%) vs 131 (18.7%); After matching: 107 (20.6%) vs 105 (20.2%)                                                                                                                          | Before matching: Median 60 (39.6-60) vs 38.7 (23.8-56.2); After matching: 60 (36.5-60) vs 38.9 (23.9-57.7)                                                                                                                  | Before matching: 285 vs 13; After matching: 19 vs 11                                                                                       | Age, Gender, Asian countries, HBeAg, ALT, HBV DNA, Platelet Count, Cirrhosis, DM, Hepatic Decompensation                                                                               | crude HR: 0.77 (0.37 - 1.60); p=0.48<br>adjusted HR: 0.81 (0.42 - 1.56); p=0.52 | 9         |
| Choi et al, <sup>2</sup> 2018 | South Korea       | Single centre (hospital cohort);<br>Multicentre (national claims database cohort) from a single country | Entecavir vs tenofovir disoproxil fumarate | Single centre before matching: (1560 vs 1141); After matching: (869 vs 869);<br>Multicentre before matching: (11 464 vs 12692); After matching: (10923 vs 10923) | Single centre before matching: 49.2 (10.5) vs 48.1 (10.5); After matching: 48.8 (10.4) vs 48.8 (10.4);<br>Multicentre before matching: 48.8 (10.4);<br>Multicentre before matching: 49.3 (9.8) vs 48.6 (9.8); After matching: 49.1 (9.8) vs 49 (9.8) | Single centre before matching: 965 (61.9%) vs 962 (60.6%); After matching: 519 (59.7%) vs 540 (62.1%);<br>Multicentre before matching: 7171 (62.6%) vs 7949 (62.6%); After matching: 6802 (62.3%) vs 6834 (62.6%) | Single centre before matching: 595 (38.1%) vs 179 (39.4%); After matching: 350 (40.3%) vs 329 (37.9%);<br>Multicentre before matching: 4293(37.4%) vs 4743 (37.4%); After matching: 4121 (37.7%) vs 4089 (37.4%) | Naive                                         | Single centre before matching: 935 (59.3%) vs 653 (57.2%); After matching: 511 (58.8%) vs 505 (58.1%);<br>Multicentre before matching: 2991 (26.1%) vs 3488 (27.5%); After matching: 2891 (26.5%) vs 2919 (26.7%) | Single centre before matching: Median 48 (36-48) vs 32(23-43); After matching: 48 (35-48) vs 32 (22-44);<br>Multicentre before matching: 51 (40.4-55.4) vs 36 (29.3-42.1); After matching: 51 (40.6-55.4) vs 36 (29.2-42.1) | Single centre before matching: 115 vs 39; After matching: 61 vs 31;<br>Multicentre before matching: 590 vs 394; After matching: 567 vs 350 | Age, Gender HBeAg, HBV DNA, ALT, Albumin, Bilirubin, INR, Platelet Count, Creatinine, DM, HTN, Cirrhosis, Ascites, Child-Pugh score; Chinese University HCC score, Cirrhosis–HCC score | adjusted HR: 0.68 (0.46 - 0.99); p=0.04                                         | 9         |
| Kim et al, <sup>3</sup> 2019  | South Korea       | Multicentre; single country                                                                             | Entecavir vs tenofovir                     | Before matching: (1484 vs                                                                                                                                        | Before matching: 48.2                                                                                                                                                                                                                                | Before matching: 889 (59.9%)                                                                                                                                                                                      | Before matching: 595 (40.1%) vs                                                                                                                                                                                  | Naive                                         | Before matching:                                                                                                                                                                                                  | Before matching:                                                                                                                                                                                                            | Before matching: 138 vs 102                                                                                                                | Age, Gender, DM, HTN, Cirrhosis, HBeAg                                                                                                                                                 | adjusted HR: 1.02 (0.77 -                                                       | 8         |

|                              |             |                               |                                            |                                                                 |                                                                                         |                                                                                         |                                                                                         |       |                                                                                         |                                                                                    |                                                     |                                                                                                                                                                                                                                                    |                                                                                     |   |
|------------------------------|-------------|-------------------------------|--------------------------------------------|-----------------------------------------------------------------|-----------------------------------------------------------------------------------------|-----------------------------------------------------------------------------------------|-----------------------------------------------------------------------------------------|-------|-----------------------------------------------------------------------------------------|------------------------------------------------------------------------------------|-----------------------------------------------------|----------------------------------------------------------------------------------------------------------------------------------------------------------------------------------------------------------------------------------------------------|-------------------------------------------------------------------------------------|---|
|                              |             |                               | disoproxil fumarate                        | 1413); After matching: (1278 vs 1278)                           | (11.5) vs 48.8 (12.0); After matching: 48.6 (11.4) vs 48.2 (12.0)                       | vs 913 (64.6%); After matching: 793 (62.1%) vs 794 (62.1%)                              | 500 (35.4%); After matching: 485 (37.9%) vs 484 (37.9%)                                 |       | 499 (33.6%) vs 411 (29.1%); After matching: 394 (30.8%) vs 400 (31.3%)                  | Mean 58.1 vs 51.3                                                                  |                                                     | status, Bilirubin, Albumin, Platelet Count                                                                                                                                                                                                         | 1.35); p=0.88                                                                       |   |
| Lee et al, <sup>4</sup> 2020 | South Korea | Single centre; single country | Entecavir vs tenofovir disoproxil fumarate | Before matching: (1583 vs 1439); After matching: (1370 vs 1370) | Before matching: 46.7 (11.8) vs 47.3 (11.6); After matching: 47.0 (11.7) vs 46.9 (11.3) | Before matching: 926 (58.5%) vs 841 (58.4%); After matching: 806 (58.8%) vs 798 (58.3%) | Before matching: 657 (41.5%) vs 598 (41.6%); After matching: 564 (41.2%) vs 572 (41.7%) | Naive | Before matching: 567 (35.8%) vs 483 (33.6%); After matching: 465 (33.9%) vs 464 (33.9%) | Before matching: Mean 51.5 vs 36.6; After matching: 51.5 vs 36.6                   | Before matching: 84 vs 50; After matching: 64 vs 47 | Age, Gender, Liver Disease Severity, APRI, FIB-4 index, DM, HTN, BMI, Alcohol Intake, Oesophageal varix, AST, ALT, Bilirubin, Albumin, Creatinine, Gamma-glutamyl Transferase, PT, Platelet Count, Child-Pugh score, HBeAg status, HBV DNA and AFP | crude HR: 1.03 (0.70 - 1.51); p=0.88<br><br>adjusted HR: 1.08 (0.52 - 2.24); p=0.84 | 9 |
| Ha et al, <sup>5</sup> 2020  | South Korea | Single centre; single country | Entecavir vs tenofovir disoproxil fumarate | Before matching: (921 vs 419); After matching: (415 vs 415)     | Before matching: 48 (15.0) vs 45 (16.0); After matching: 48 (16.0) vs 48 (14.0)         | Before matching: 558 (61.0%) vs 266 (63.0%); After matching: 181 (61.0%) vs 179 (60.0%) | Before matching: 363 (39.0%) vs 153 (37.0%); After matching: 117 (39.0%) vs 119 (40.0%) | Naive | Before matching: 259 (28%) vs 39 (9.3%); After matching: 39 (9%) vs 39 (9%)             | -                                                                                  | Before matching: 82 vs 24                           | Age, Gender, Alcohol Intake, DM, Cirrhosis, HBeAg, HBV DNA, HBsAg titer, AST, ALT, AFP, Albumin, Bilirubin, PT, Platelet Count, Treatment Initiation                                                                                               | adjusted HR: 1.84 (0.90 - 3.79); p=0.088                                            | 8 |
| Kim et al, <sup>6</sup> 2018 | South Korea | Single centre; single country | Entecavir vs tenofovir disoproxil fumarate | Before matching: (721 vs 604); After matching: (354 vs 354)     | Before matching: 52 (11) vs 50 (11); After matching: 51 (11) vs 51 (11)                 | Before matching: 471 (65.3%) vs 363 (60.1%); After matching: 220 (62.1%) vs 222 (62.7%) | Before matching: 250 (34.7%) vs 241 (39.9%); After matching: 134 (37.9%) vs 132 (37.3%) | Naive | Before matching: 346 (48%) vs 267 (44.2%); After matching: 169 (47.7%) vs 156 (44.1%)   | Before matching: Median 66 (36.88) vs 33(21-46); After matching: Mean 48.1 vs 32.9 | Before matching: 40 vs 14; After matching: 24vs7    | Age, Gender, HBeAg, Cirrhosis, HBV DNA, ALT, AST, Albumin, Bilirubin, Creatinine, INR, Platelet Count, DM, HTN                                                                                                                                     | crude HR: 0.53 (0.22 - 1.25); p=0.15<br><br>adjusted HR: 0.56 (0.21 - 1.54); p=0.27 | 8 |

|                                |             |                                                         |                                            |                                                                   |                                                                                         |                                                                                             |                                                                                           |                 |                                                                                         |                                                                                     |                                                     |                                                                                                                                                                            |                                          |   |
|--------------------------------|-------------|---------------------------------------------------------|--------------------------------------------|-------------------------------------------------------------------|-----------------------------------------------------------------------------------------|---------------------------------------------------------------------------------------------|-------------------------------------------------------------------------------------------|-----------------|-----------------------------------------------------------------------------------------|-------------------------------------------------------------------------------------|-----------------------------------------------------|----------------------------------------------------------------------------------------------------------------------------------------------------------------------------|------------------------------------------|---|
| Oh et al, <sup>7</sup> 2020    | South Korea | Multicentre; single country                             | Entecavir vs tenofovir disoproxil fumarate | Before matching: (753 vs 807); After matching: (516 vs 516)       | Before matching: 48.7 (11.4) vs 46.3 (11.2); After matching: 49.2 (12.6) vs 49 (9.4)    | Before matching: 480 (63.7%) vs 503 (62.3%); After matching: 319 (61.8%) vs 325 (63.0%)     | Before matching: 273 (36.3%) vs 304 (37.7%); After matching: 197 (38.2%) vs 191 (37.0%)   | Naive           | Before matching: 315 (41.8%) vs 310 (38.4%); After matching: 238 (46.1%) vs 224 (43.4%) | Before matching: Mean 56.4 (12) vs 54(13.2); After matching: 58.8(10.8) vs 56.4(12) | Before matching: 34 vs 45; After matching: 29 vs 37 | Age, Gender, CKD, HTN, DM, Cirrhosis, Decompensation, HBeAg, HBV DNA, Child-Pugh Score, MELD, FIB-4, AFP, Platelet count, Albumin, Bilirubin, eGFR, INR                    | crude HR: 1.30 (0.80 - 2.02); p=0.30     | 8 |
| Yip et al, <sup>8</sup> 2020   | Hong Kong   | Multicentre; single territory; electronic health record | Entecavir vs tenofovir disoproxil fumarate | Before matching: (28 041 vs 1309); After matching: (1200 vs 1200) | Before matching: 53.4 (13.0) vs 43.2 (13.1); After matching: 42.9 (12.7) vs 44.4 (13.1) | Before matching: 18 094 (64.5%) vs 591 (45.1%); After matching: 2267 (48.9%) vs 587 (48.9%) | Before matching: 9947 (35.5%) vs 718 (54.9%); After matching: 2369 (51.1%) vs 613 (51.1%) | Naive           | Before matching: 3822 (13.6%) vs 38 (2.9%); After matching: 167 (3.6%) vs 37(3.1%)      | After matching: 33.6(18-55.2) vs 34.8 (18-54)                                       | Before matching: 1386 vs 8; After matching: 76 vs 8 | Age, gender, Serum HBV DNA, ALT, Albumin, Total bilirubin, INR, Platelet count, Creatinine, RRT, Cirrhosis, Ascites, Hepatic Encephalopathy, DM, HTN, Treatment Initiation | adjusted HR: 0.39 (0.18 - 0.84); p=0.016 | 9 |
| Shin et al, <sup>9</sup> 2021  | South Korea | Single centre; single country                           | Entecavir vs tenofovir disoproxil fumarate | Before matching: (894 vs 900); After matching: (589vs 589)        | Before matching: 52.0 (11.0) vs 51.0 (11.0); After matching: 50.0 (11.0) vs 50.0 (11.0) | Before matching: 597 (66.78) vs 571 (63.44); After matching: 365 (61.97) vs 358 (60.78)     | Before matching: 297 (33.2) vs 329 (36.6); After matching: 224 (38.0) vs 231 (39.2)       | Naive           | Before matching: 440 (49.22) vs 375 (41.67); After matching: 276 (46.86) vs 282 (47.88) | Before matching: Median 82.8 (51.6-105.7) vs 45.6 (32.4-60)                         | Before matching: 31 vs 74                           | Age, Gender, HBV DNA, HBeAg, ALT, Albumin, INR, Platelet Count, DM, Cirrhosis, Virologic Response                                                                          | adjusted HR: 0.77 (0.46 - 1.29); p=0.32  |   |
| Chen et al, <sup>10</sup> 2020 | Taiwan      | Multicentre; single country                             | Entecavir vs tenofovir disoproxil fumarate | 545 vs 545                                                        | 55.4 (11.7) vs 54.5 (12.9)                                                              | 721 (72.6) vs 428 (75.5)                                                                    | 272 (27.4) vs 139 (24.5)                                                                  | 11.9% vs 15.7%* | 545 (100.0) vs 545 (100.0)                                                              | -                                                                                   | 196 vs 48                                           | Age, Gender, DM, HTN, Decompensation, AST, ALT, Bilirubin, INR, Albumin, Platelet Count, eGFR, FIB-4, APRI, HBV DNA, HBeAg, AFP                                            | adjusted HR: 0.66 (0.46 - 0.95); p=0.023 | 9 |
| Hu et al, <sup>11</sup> 2020   | Taiwan      | Single centre; single country                           | Entecavir vs tenofovir disoproxil fumarate | Before matching: (678 vs 216); After                              | Before matching: 59.4 (11.1) vs 56.1 (11.6);                                            | Before matching: 491 (72.4) vs 162 (75.0); After                                            | Before matching: 187 (27.6) vs 54 (25.0); After matching: 165                             | Naive           | Before matching: 678 (100.0) vs 216 (100.0);                                            | -                                                                                   | Before matching: 111 vs 19                          | Age, AFP, Albumin, HBV DNA, eGFR, family history, Upper                                                                                                                    | adjusted HR: 0.66 (0.38 - 1.14); p=0.14  | 8 |

|                                 |             |                               |                                            |                                                                |                                                                                           |                                                                                         |                                                                                       |                                                                |                                                                                      |                                                                                               |                             |                                                                                                                                                             |                                                                                 |   |
|---------------------------------|-------------|-------------------------------|--------------------------------------------|----------------------------------------------------------------|-------------------------------------------------------------------------------------------|-----------------------------------------------------------------------------------------|---------------------------------------------------------------------------------------|----------------------------------------------------------------|--------------------------------------------------------------------------------------|-----------------------------------------------------------------------------------------------|-----------------------------|-------------------------------------------------------------------------------------------------------------------------------------------------------------|---------------------------------------------------------------------------------|---|
|                                 |             |                               | l fumarate                                 | matching: (607 vs 157)                                         | After matching: 58.8 (10.8) vs 58.6 (11.0)                                                | matching: 442 (72.8) vs 115 (73.2)                                                      | (27.2) vs 42 (26.8)                                                                   |                                                                | After matching: 607 (100.0) vs 157 (100.0)                                           |                                                                                               |                             | Gastrointestinal Varices                                                                                                                                    |                                                                                 |   |
| Ha et al, <sup>12</sup> 2020    | South Korea | Single centre; single country | Entecavir vs tenofovir disoproxil fumarate | 180 vs 224                                                     | 45.5 (10.8) vs 44.5 (11.4)                                                                | 106 (58.9) vs 120 (53.6)                                                                | 74 (41.1) vs 104 (46.4)                                                               | Naive                                                          | 67 (37.20) vs 78 (34.8)                                                              | Median 64.0 (30.5-84.3) vs 49.1 (37.7-62.2)                                                   | 18 vs 6                     | Age, Gender, DM, HTN, Cirrhosis, HBeAg, AST, ALT, Bilirubin, Albumin, Platelet Count                                                                        | crude HR: 0.27 (0.08 - 0.98); p=0.046                                           | 9 |
| Chang et al, <sup>13</sup> 2021 | Taiwan      | Multicentre; single country   | Entecavir vs tenofovir disoproxil fumarate | Before matching: (5348 vs 1900); After matching (3304 vs 1652) | Before matching: 54.0 (11.92) vs 51.0 (12.19); After matching: 52.0 (11.0) vs 52.0 (12.0) | Before matching: 3544 (66.0) vs 1302 (69.0); After matching: 2210 (67.0) vs 1106 (67.0) | Before matching: 1804 (34.0) vs 598 (31.0); After matching: 1094 (33.0) vs 546 (33.0) | Before matching: 9.0% vs 23.0%; After matching: 8.0% vs 23.0%* | Before matching: 1590 (30.0) vs 590 (31.0); After matching: 930 (28.0) vs 509 (31.0) | Before matching: Mean 39.6 (24.6) vs 40.08 (22.1); After matching: 40.08(24.4) vs 41.04(22.2) | Before matching: 375 vs 100 | Age, Race, Gender, BMI, DM, CCI, alcoholism, substance abuse, HIV, HCV, Cirrhosis, HBV, HBeAg, Platelet Count, AST/ALT, Albumin, Bilirubin, INR, Creatinine | crude HR: 0.82 (0.64 - 1.04); p=0.10<br>adjusted HR: 0.83 (0.65 - 1.06); p=0.13 | 9 |
| Su et al, <sup>14</sup> 2021    | USA         | Multicentre; single country   | Entecavir vs tenofovir disoproxil fumarate | 2193 vs 1094                                                   | 56.5 (12.2) vs 55.4 (12.4)                                                                | 2116 (96.5) vs 1039 (95.0)                                                              | 77 (3.5) vs 60 (5.0)                                                                  | 36.6% vs 31.9%*                                                | 453 (20.7) vs 227 (20.8)                                                             | Mean 67.2 vs 64.8                                                                             | 167 vs 85                   |                                                                                                                                                             | crude HR: 1.10 (0.83 - 1.43)<br>adjusted HR: 1.00 (0.76 - 1.32)                 | 8 |

**Abbreviations:** IQR = interquartile range; SD = standard deviation; HBV = hepatitis B virus; INR = international normalised ratio; HTN = hypertension, DM = diabetes mellitus; RRT = renal replacement therapy; HBeAg = Hepatitis B e antigen; ALT = alanine aminotransferase; AST = aspartate aminotransferase; AFP = alpha fetoprotein; APRI = AST to platelet ratio index; BMI = body mass index; FIB-4 = fibrosis-4 index; PT = prothrombin time; MELD = model for end-stage liver disease; eGFR = estimated glomerular filtration rate; CCI = Charlson Comorbidity Index; HIV = human immunodeficiency virus; NOS = Newcastle-Ottawa Score; PS = propensity score; HR = hazard ratio

\*Refers to the proportion of patients that had received previous nucleos(t)ide analogue treatment before initiation of tenofovir or entecavir

**eFigure 1. Reconstructed Survival Curves**

**Hsu et al 2020**

Original

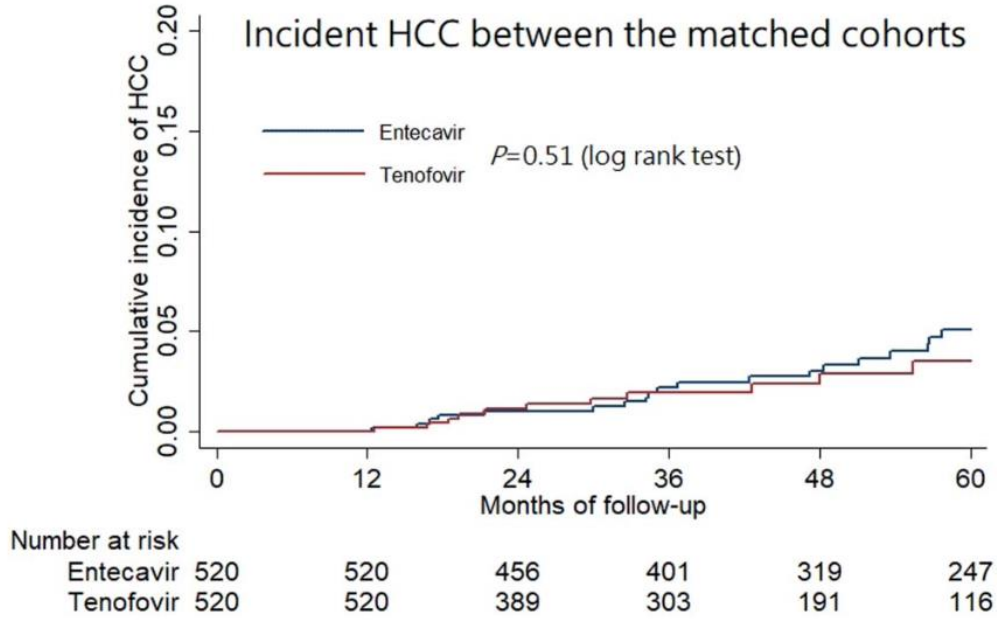

Reconstructed

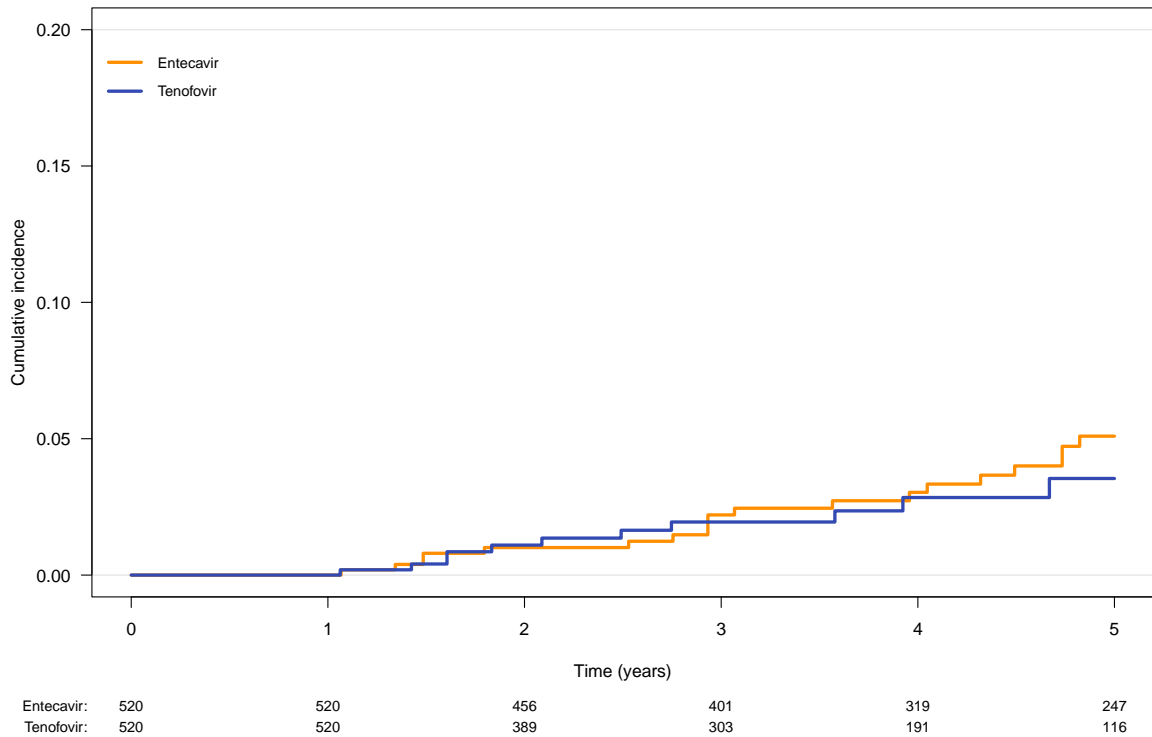

Choi et al 2018

Original

**C** HCC in propensity score-matched hospital validation cohort

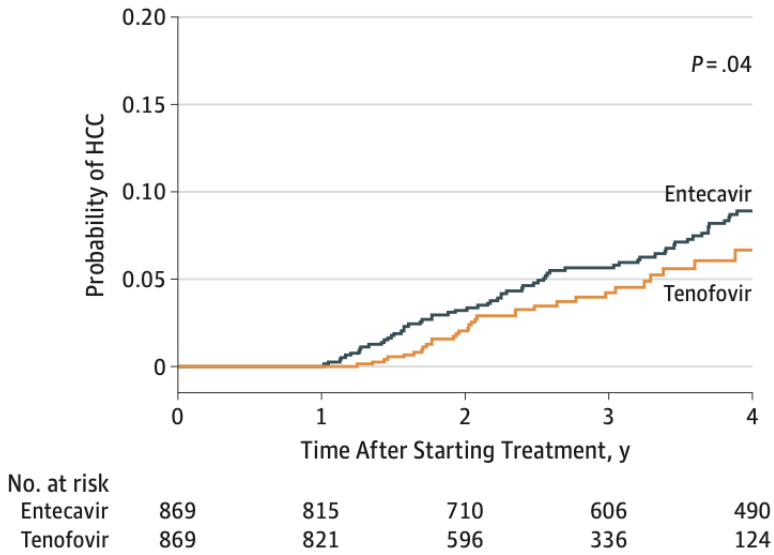

Reconstructed

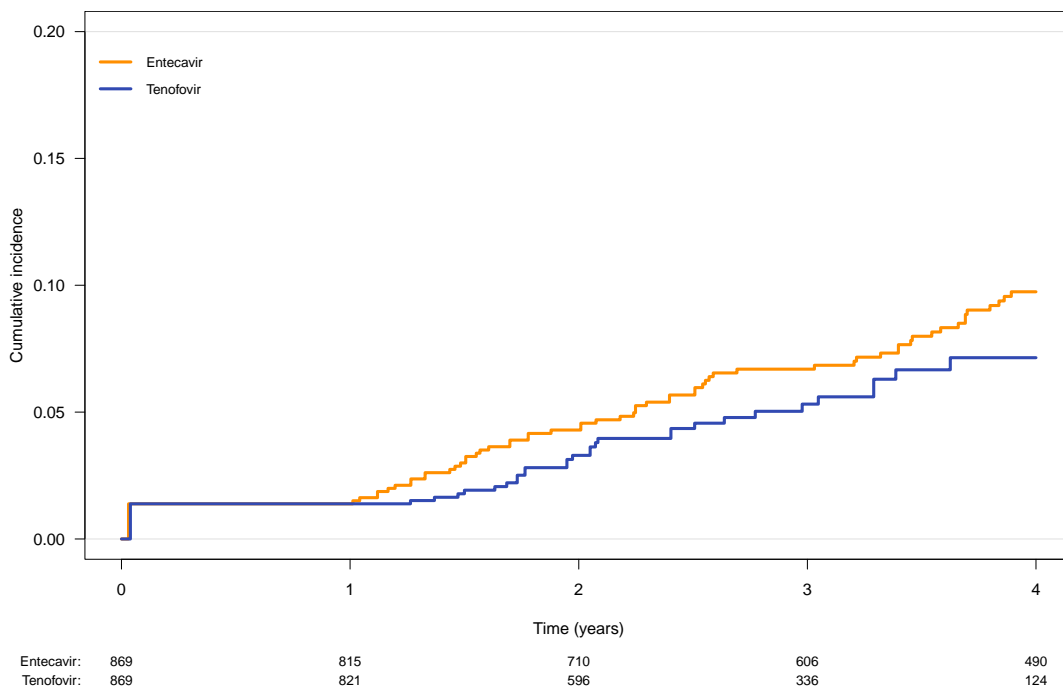



# Kim et al 2019

Original

## A

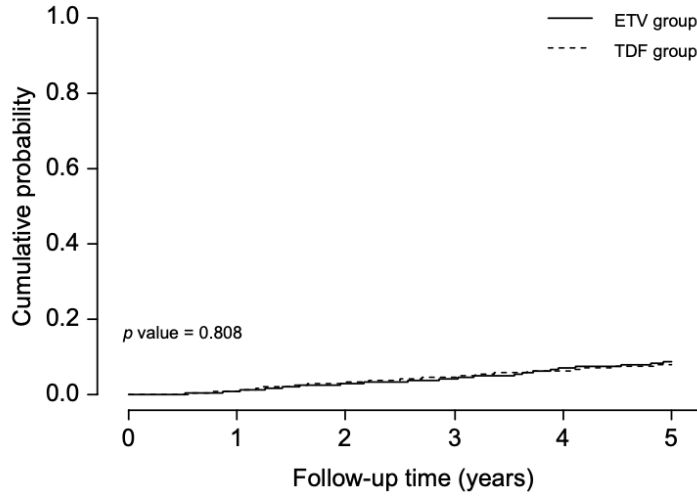

| N° at risk |                                                |
|------------|------------------------------------------------|
| ETV        | 1,278    1,227    1,141    1,065    922    765 |
| TDF        | 1,278    1,242    1,149    1,073    907    515 |

Reconstructed

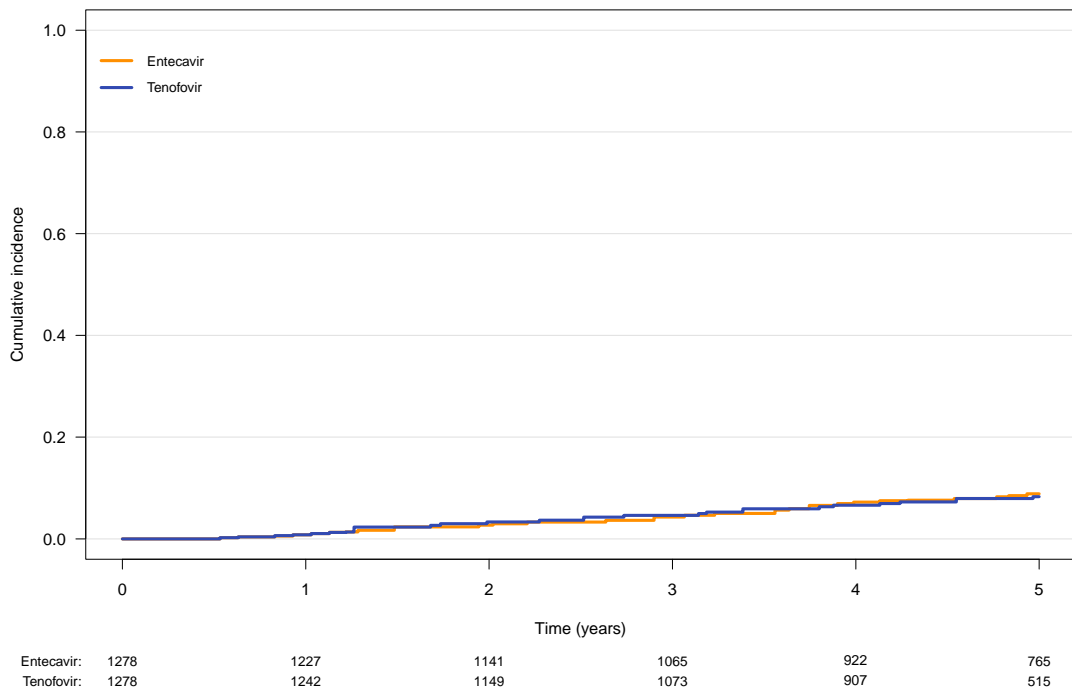

**B**

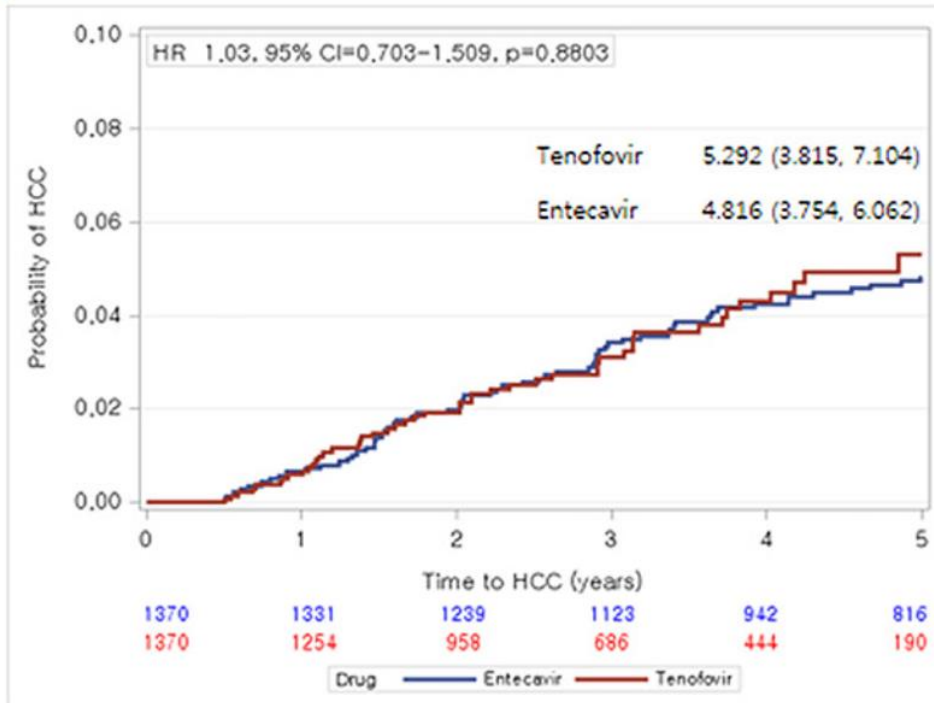

Reconstructed

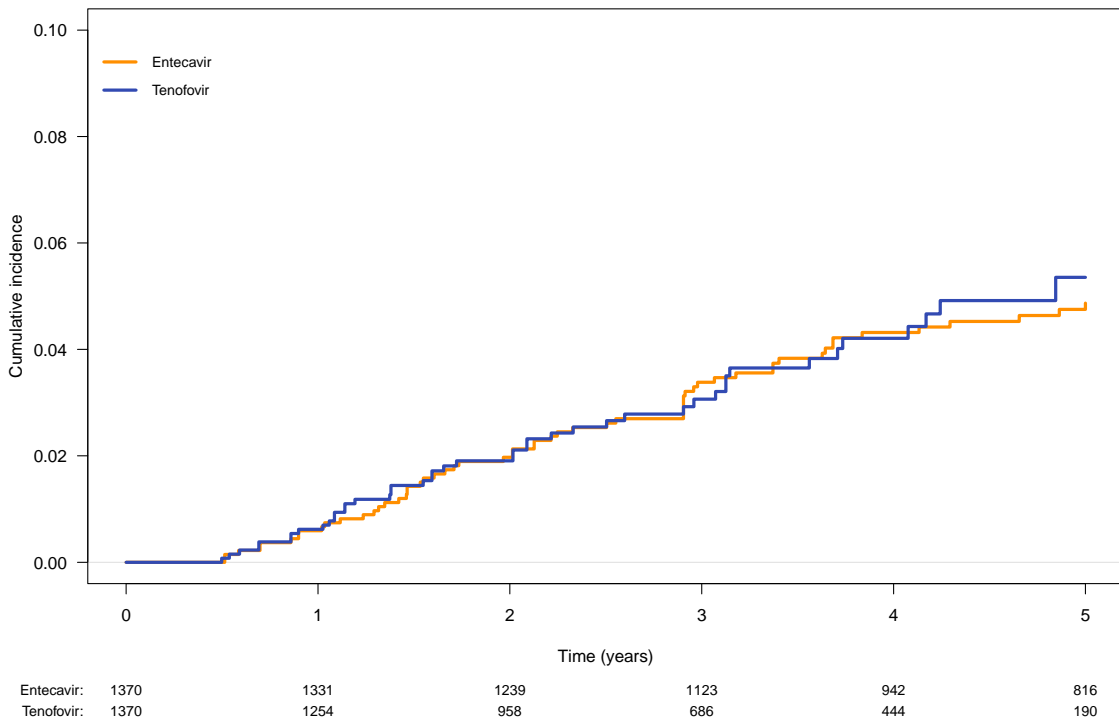

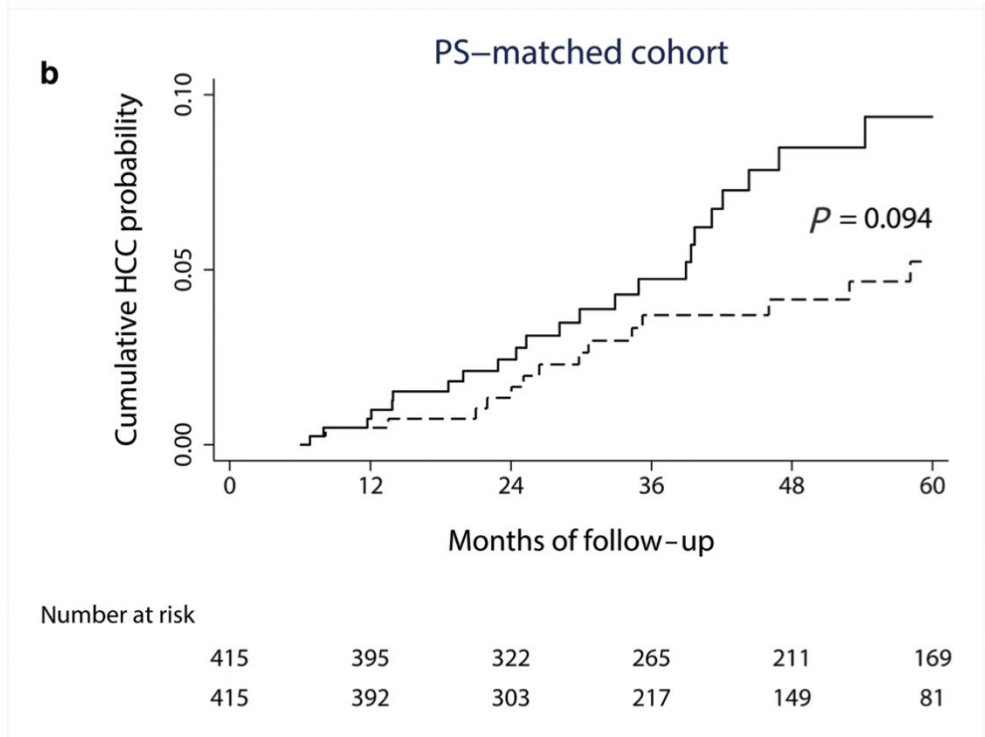

Reconstructed

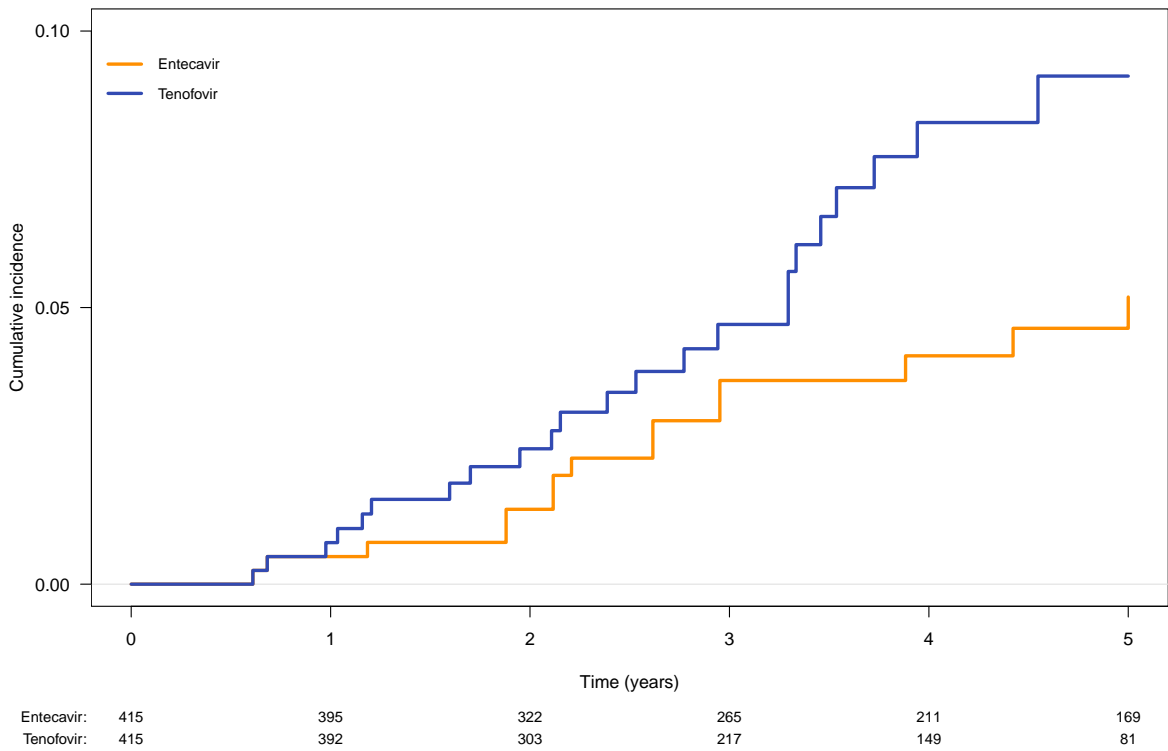

Kim et al 2018

Original

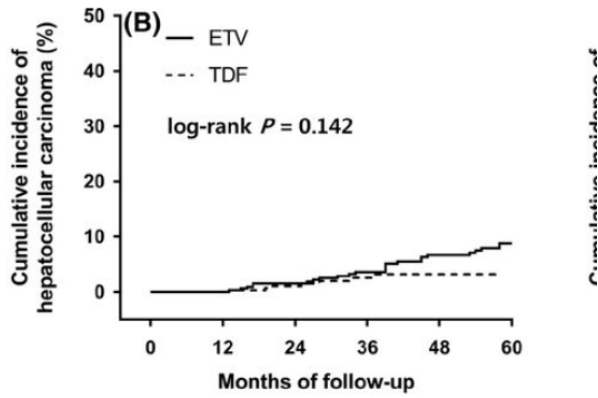

| Number at risk |     |     |     |     |     |     |  |
|----------------|-----|-----|-----|-----|-----|-----|--|
| ETV            | 354 | 354 | 300 | 269 | 232 | 199 |  |
| TDF            | 354 | 354 | 232 | 148 | 77  | 0   |  |

Reconstructed

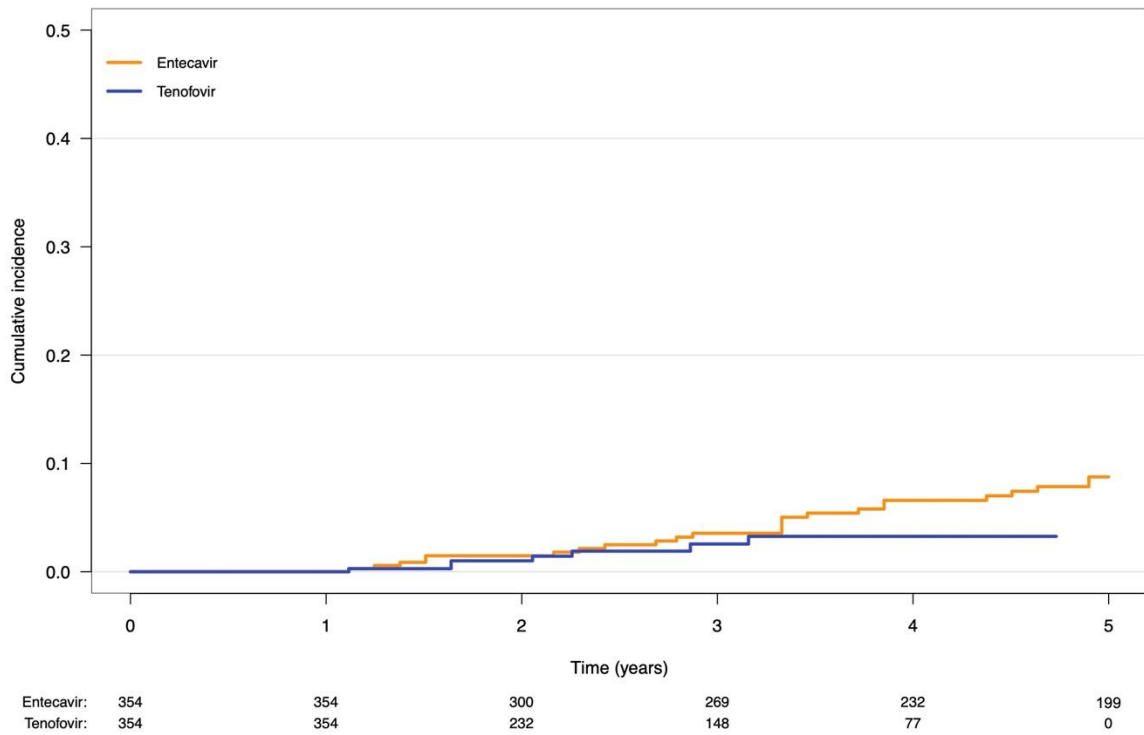

Oh et al 2020

Original

**B**

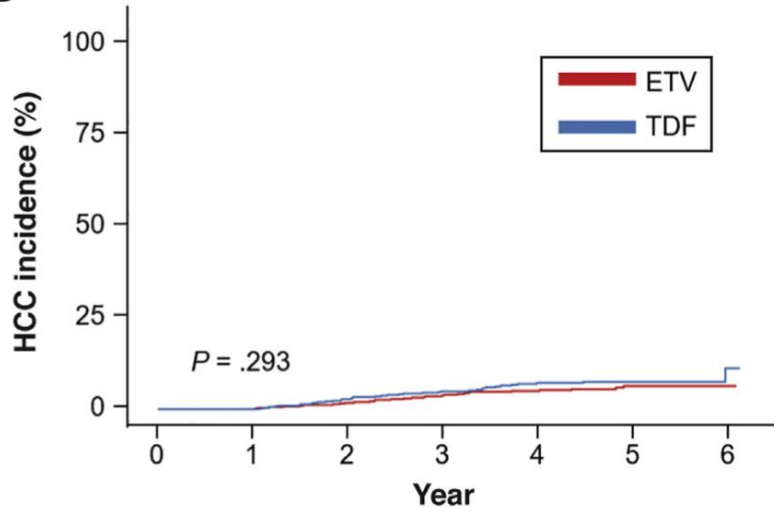

Number at risk

|     |     |     |     |     |     |     |    |
|-----|-----|-----|-----|-----|-----|-----|----|
| ETV | 516 | 516 | 496 | 479 | 428 | 183 | 13 |
| TDF | 516 | 516 | 497 | 478 | 359 | 205 | 18 |

Reconstructed

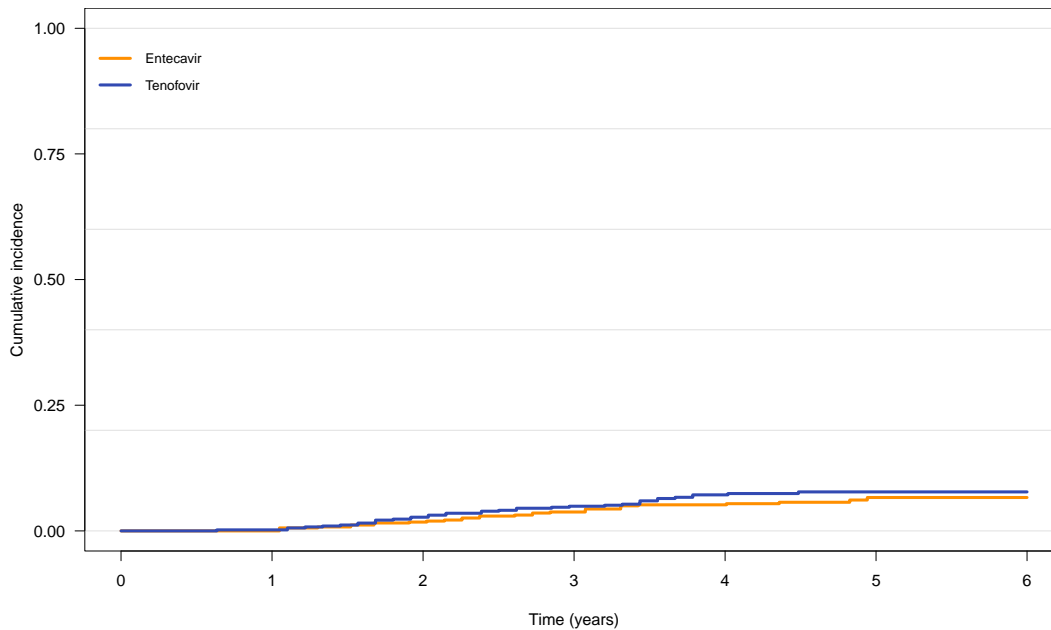

|            |     |     |     |     |     |     |    |
|------------|-----|-----|-----|-----|-----|-----|----|
| Entecavir: | 516 | 516 | 496 | 479 | 428 | 183 | 13 |
| Tenofovir: | 516 | 515 | 497 | 478 | 359 | 205 | 18 |

Yip et al 2020

Original

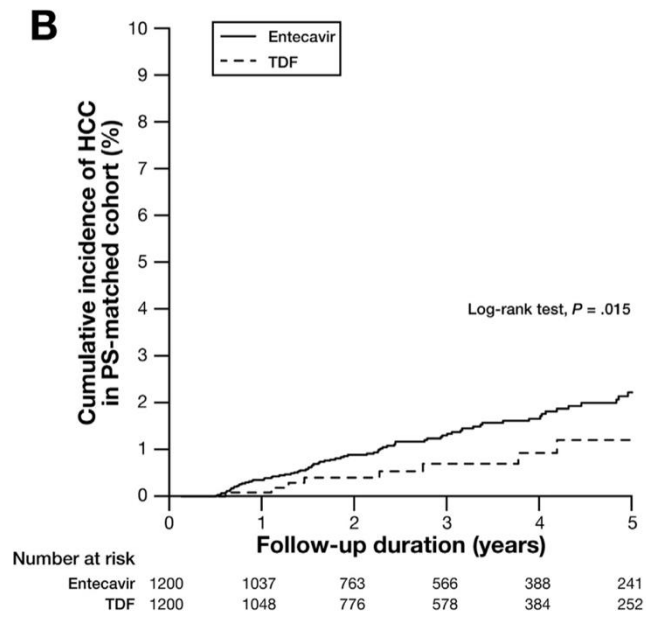

Reconstructed

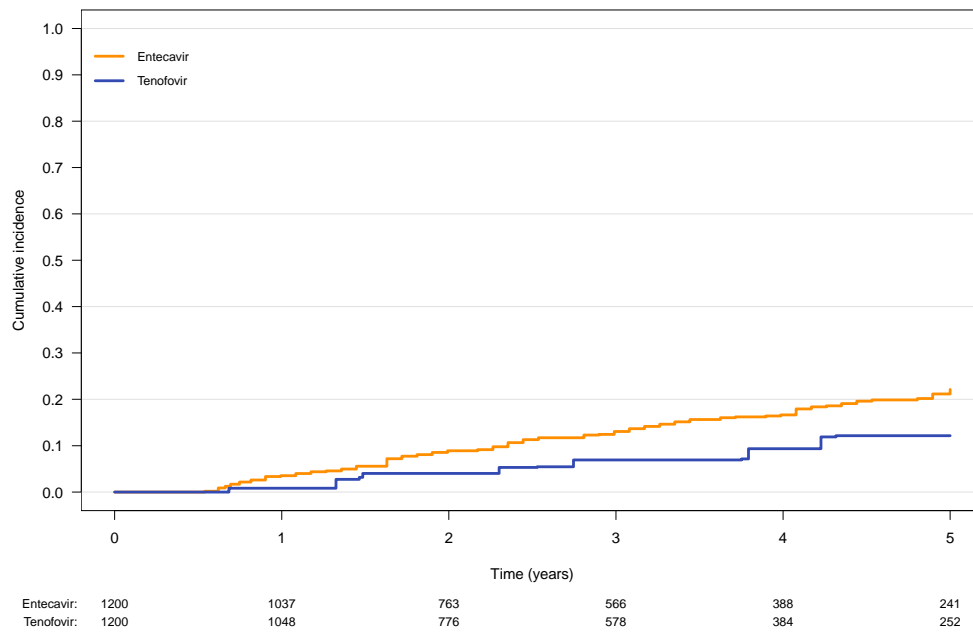

Original

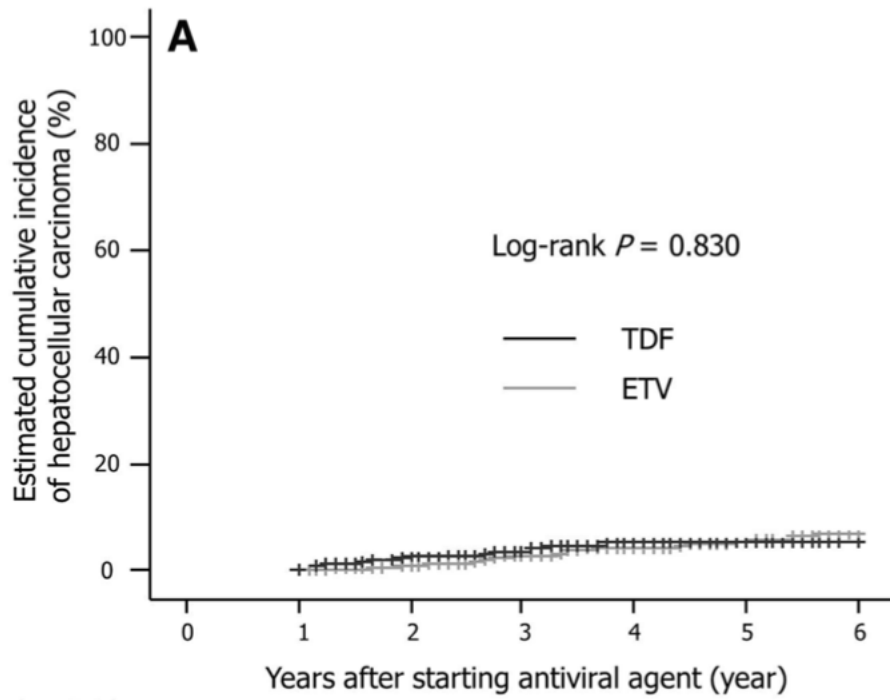

Reconstructed

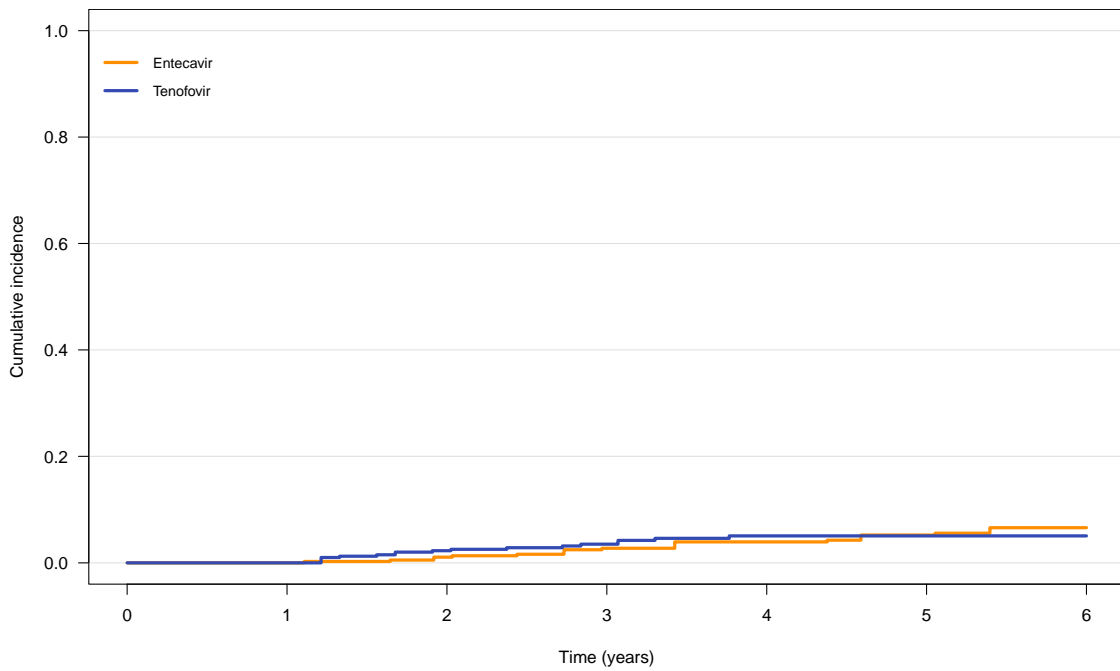

Chen et al 2020

Original

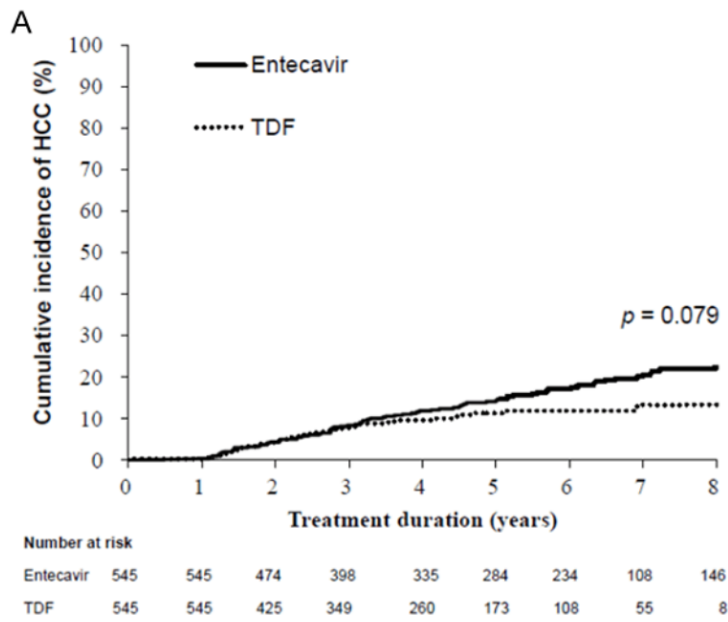

Reconstructed

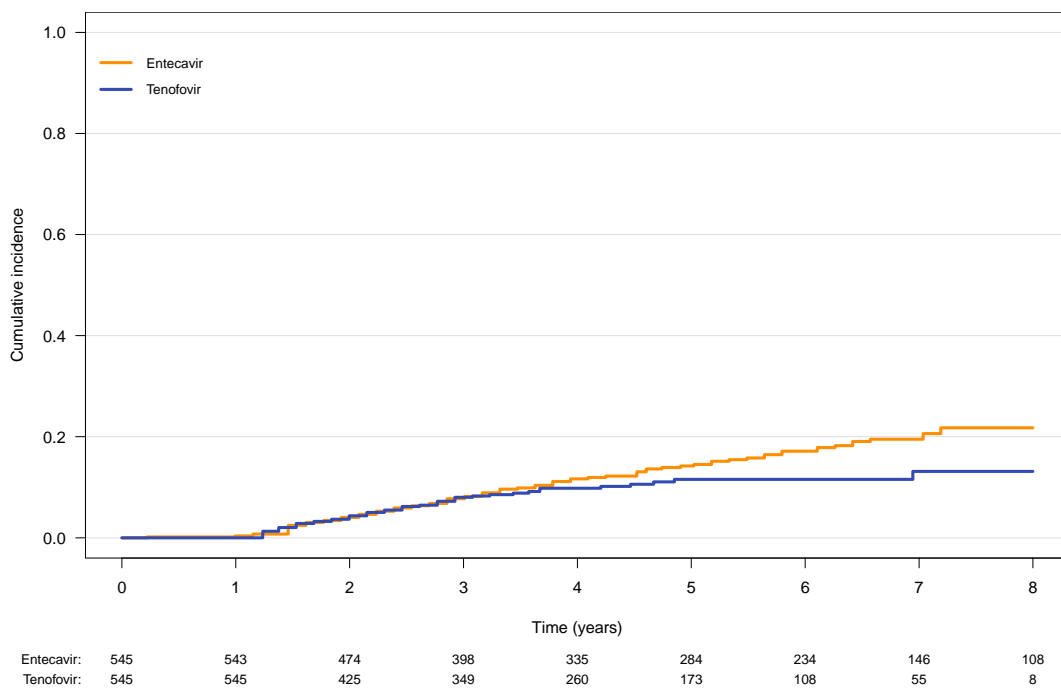



Hu et al 2020

Original

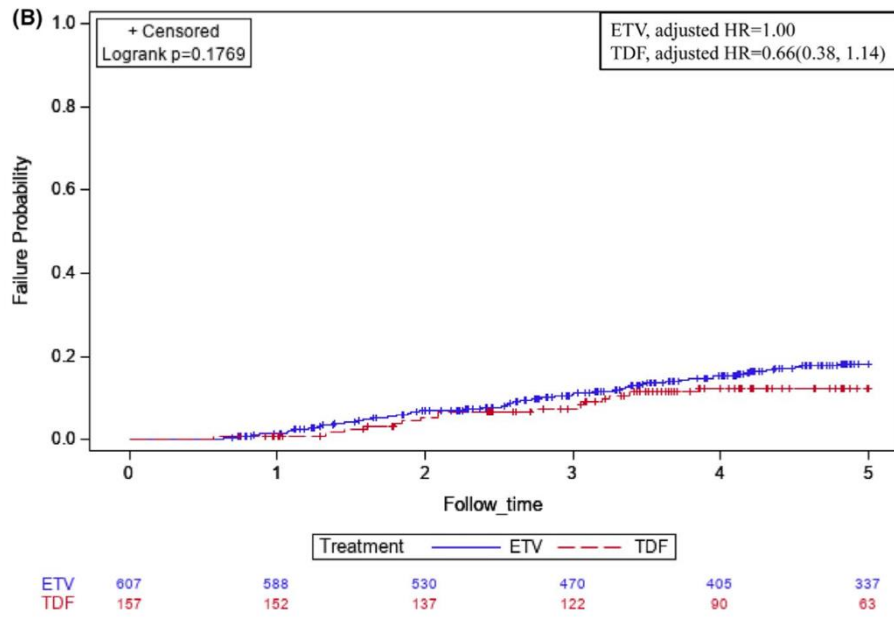

Reconstructed

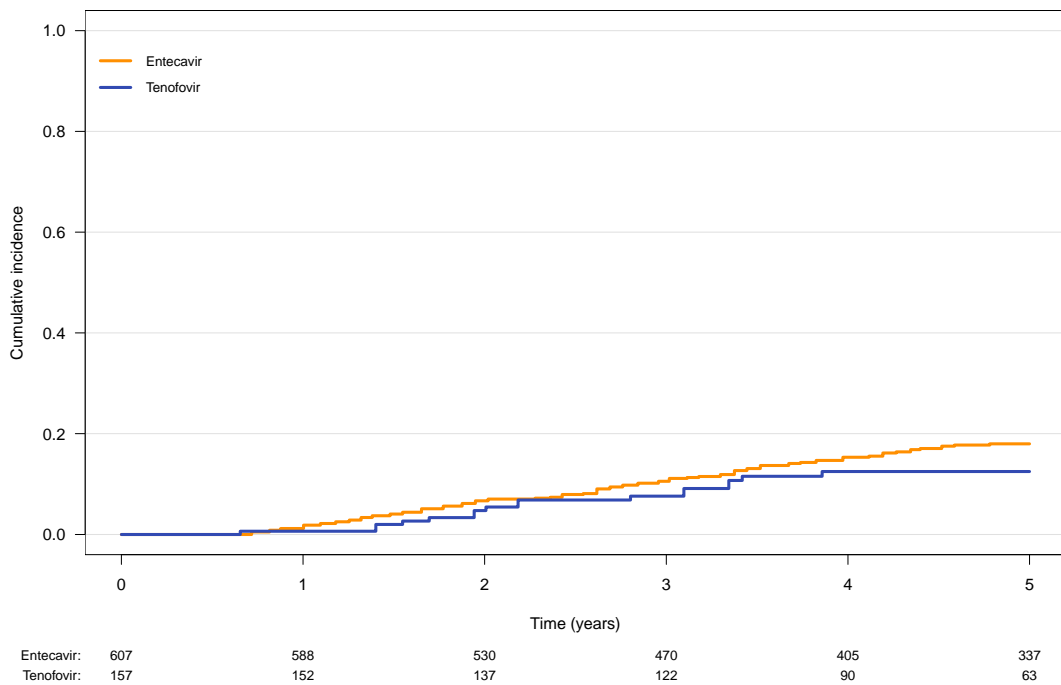

Ha et al 2020

Original

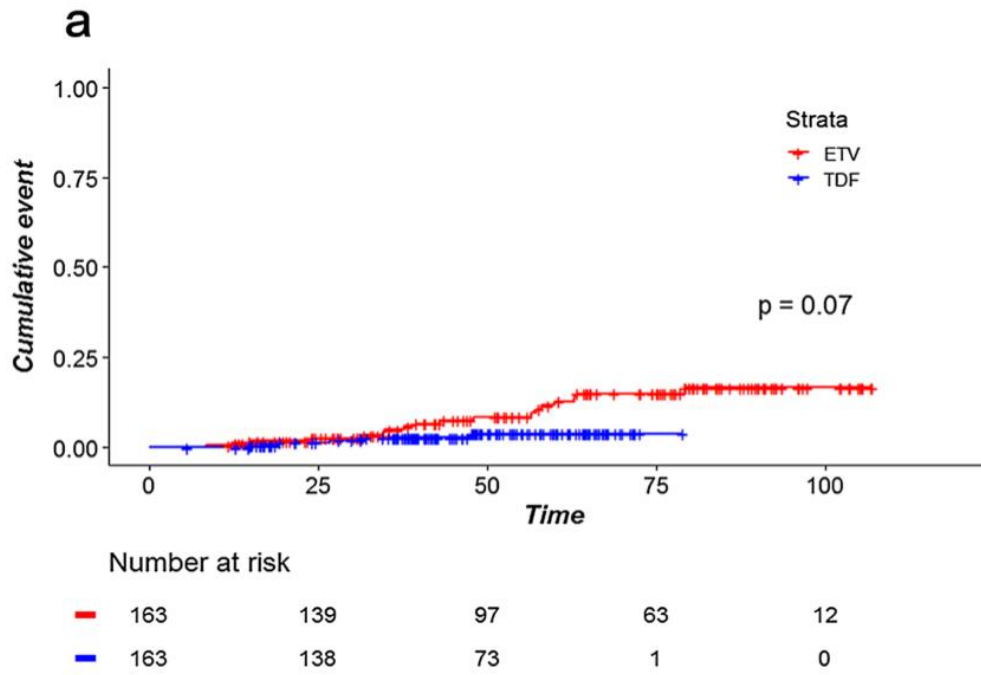

Reconstructed

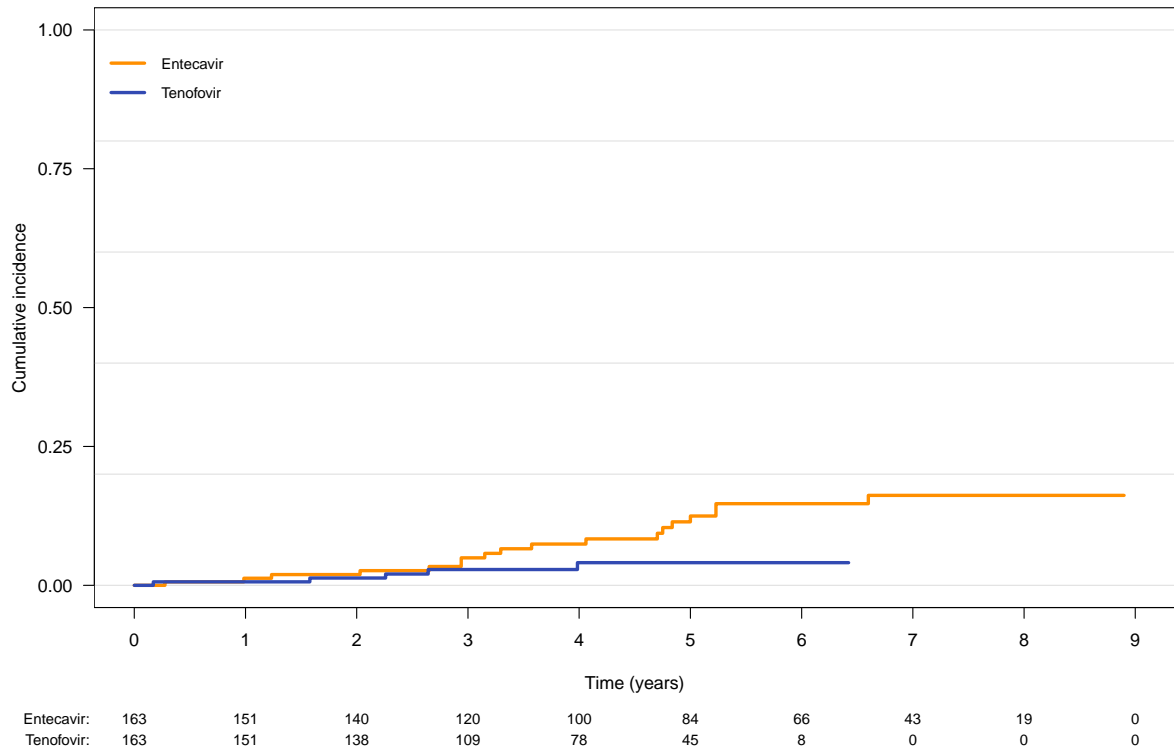

# Chang et al 2021

Original

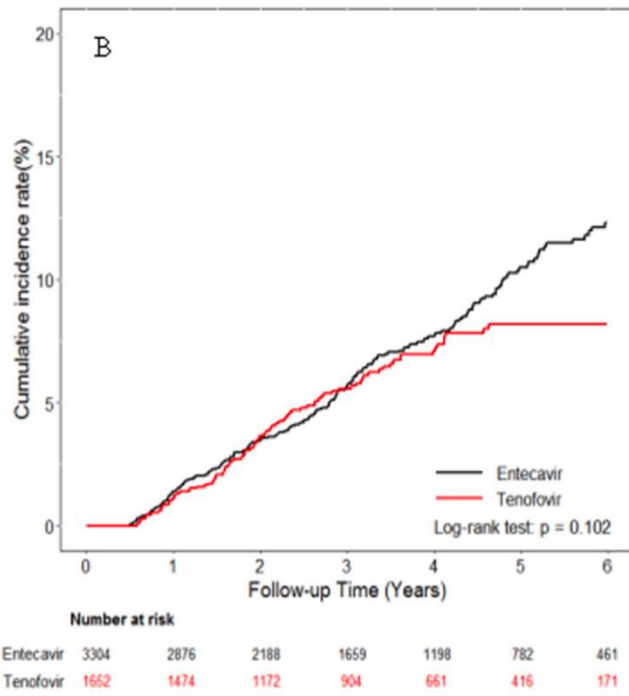

Reconstructed

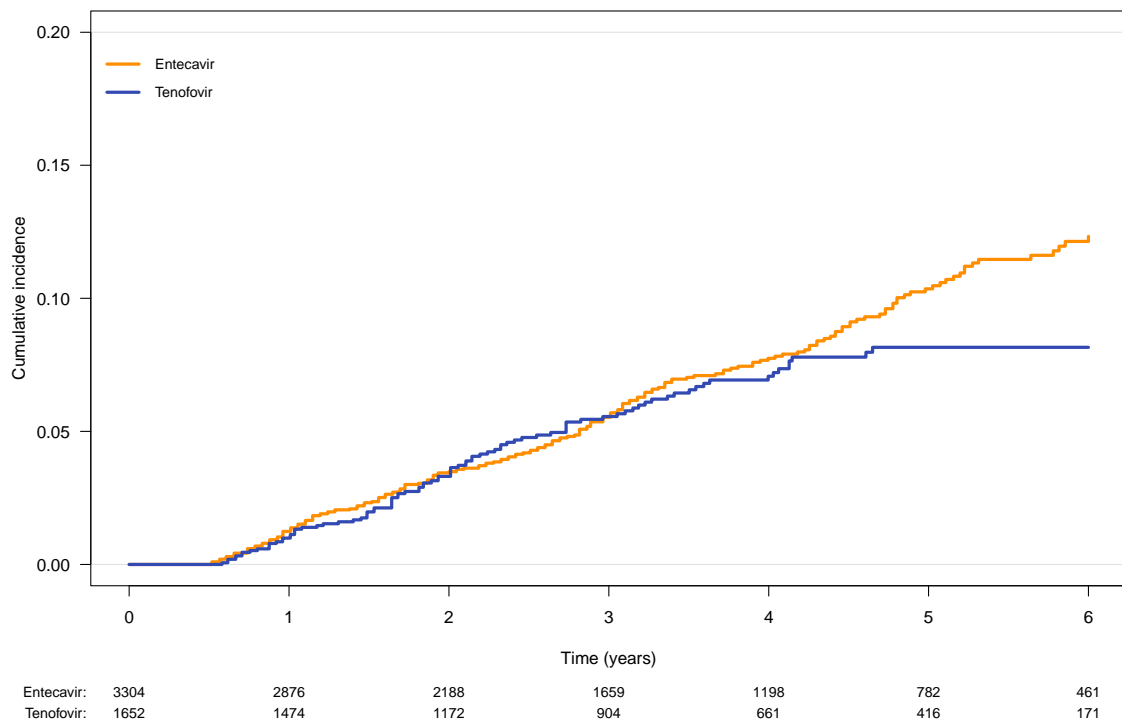

Su et al 2021

Original

B

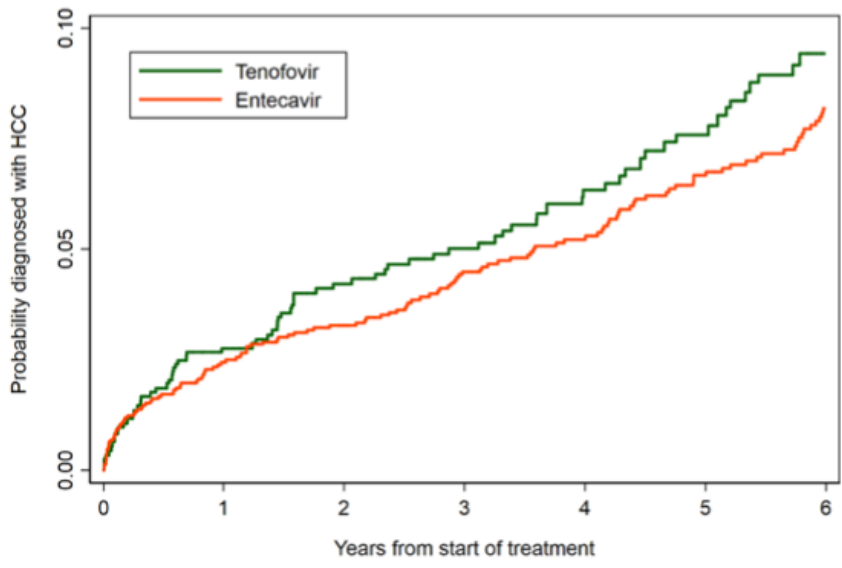

Reconstructed

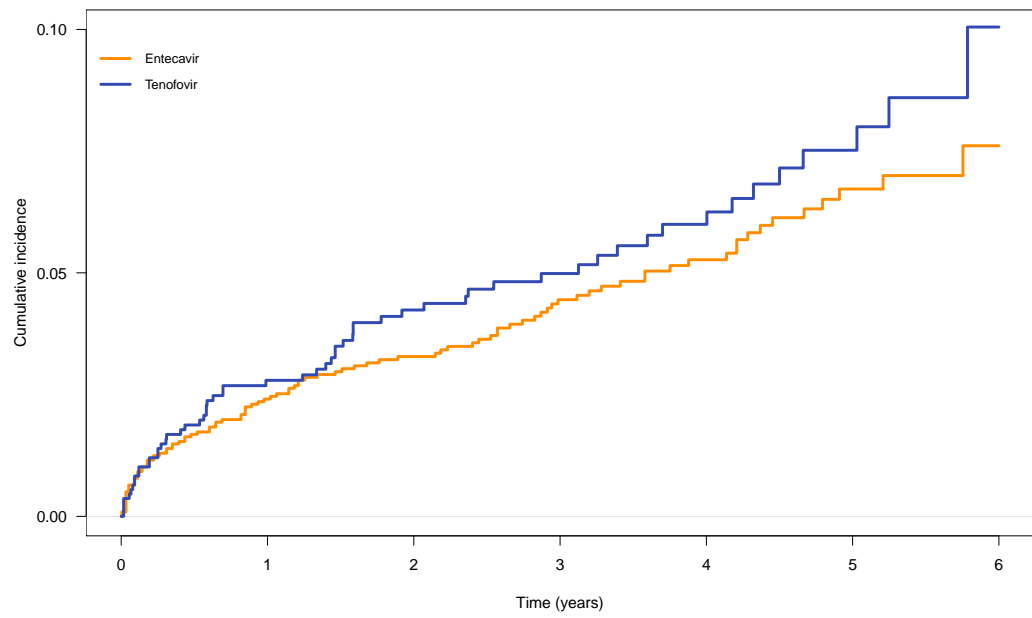

**eFigure 2.** Assessment of Publication Bias

Funnel plot for analysis of the overall cohort

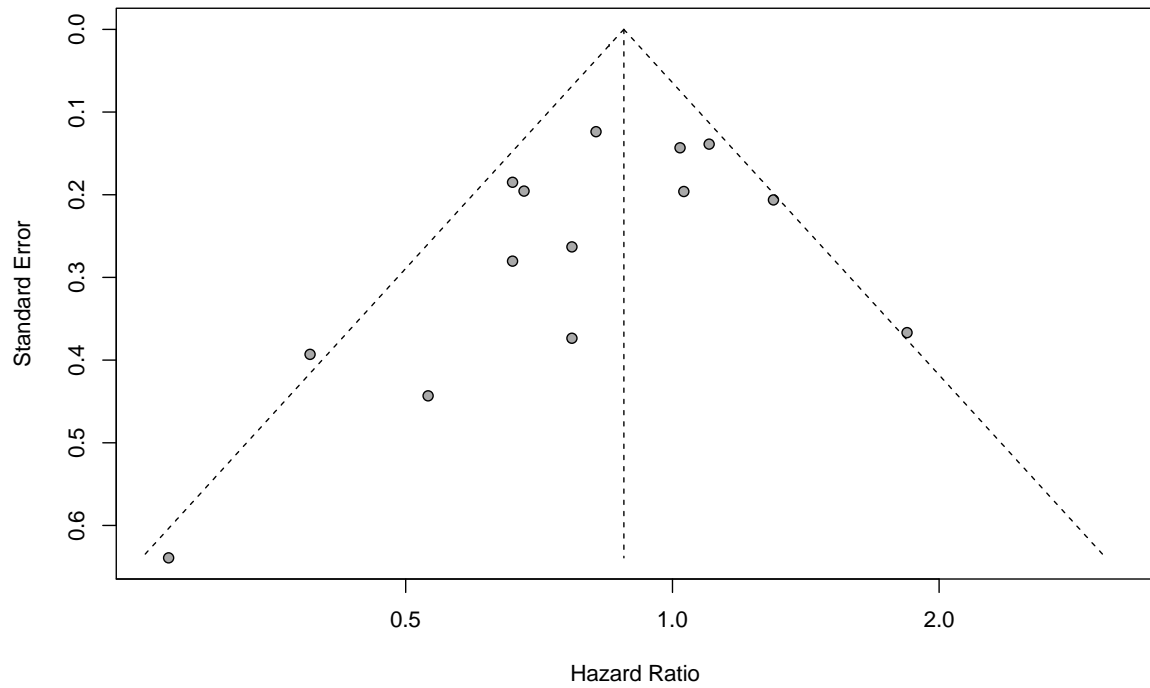

Funnel plot for sensitivity analysis of clinic cohort studies

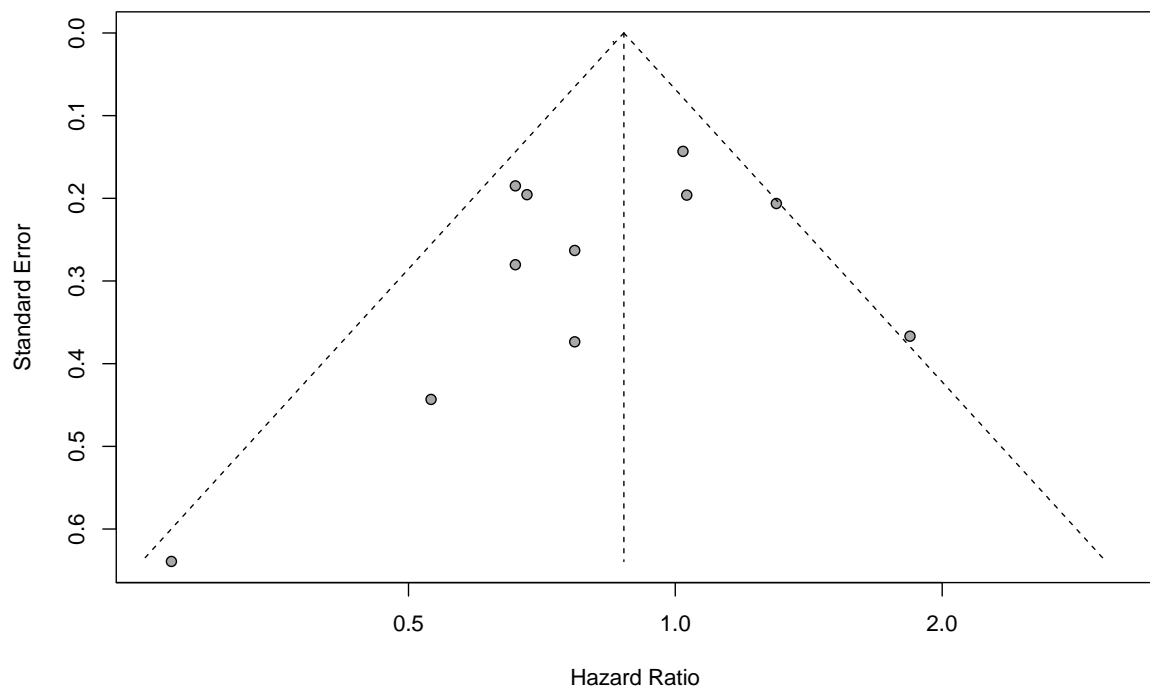

Funnel plot for sensitivity analysis of studies involving only treatment-naïve patients

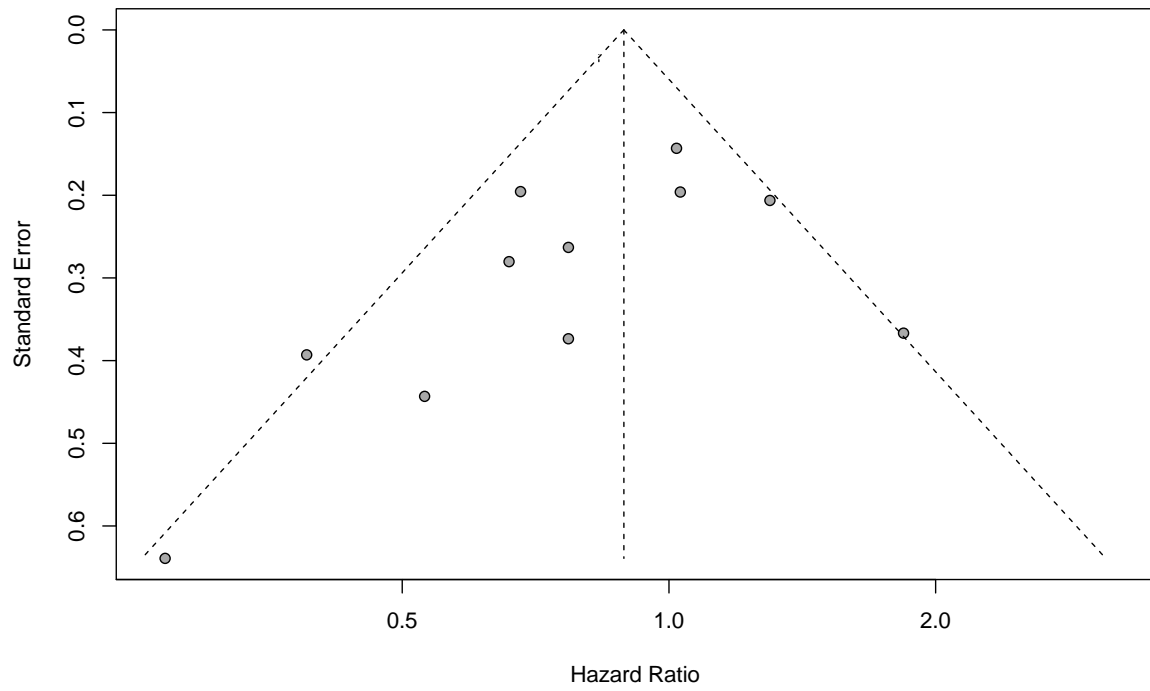

**eTable 2.** Restricted Mean Survival Time (RMST) Analysis of HCC Incidence in Patients Treated With Tenofovir vs Entecavir

A. In overall cohort and patients with cirrhosis only

| Time/ years           | RMST                     |                          | RMST difference             | p      | RMST ratio                | p      |
|-----------------------|--------------------------|--------------------------|-----------------------------|--------|---------------------------|--------|
|                       | Tenofovir                | Entecavir                |                             |        |                           |        |
| <i>Overall cohort</i> |                          |                          |                             |        |                           |        |
| 1                     | 0.996<br>(0.995 - 0.997) | 0.995<br>(0.994 - 0.996) | 0.001<br>(0.000 to 0.003)   | 0.16   | 1.001<br>(1.000 to 1.003) | 0.16   |
| 2                     | 1.976<br>(1.973 - 1.979) | 1.970<br>(1.967 - 1.973) | 0.006<br>(0.001 to 0.010)   | 0.02   | 1.003<br>(1.001 to 1.005) | 0.02   |
| 3                     | 2.935<br>(2.929 - 2.942) | 2.925<br>(2.919 - 2.932) | 0.010<br>(0.001 to 0.019)   | 0.03   | 1.003<br>(1.000 to 1.007) | 0.03   |
| 4                     | 3.877<br>(3.866 - 3.888) | 3.859<br>(3.847 - 3.868) | 0.020<br>(0.005 to 0.035)   | 0.01   | 1.005<br>(1.001 to 1.009) | 0.01   |
| 5                     | 4.803<br>(4.786 - 4.819) | 4.769<br>(4.755 - 4.784) | 0.033<br>(0.011 to 0.055)   | <0.001 | 1.007<br>(1.002 to 1.012) | <0.001 |
| <i>Cirrhosis only</i> |                          |                          |                             |        |                           |        |
| 1                     | 0.980<br>(0.975 - 0.985) | 0.982<br>(0.977 - 0.986) | -0.002<br>(-0.008 to 0.005) | 0.57   | 0.998<br>(0.992 to 1.005) | 0.57   |
| 2                     | 1.935<br>(1.924 - 1.947) | 1.932<br>(1.922 - 1.943) | 0.003<br>(-0.013 to 0.018)  | 0.74   | 1.001<br>(0.993 to 1.009) | 0.74   |
| 3                     | 2.855<br>(2.835 - 2.876) | 2.845<br>(2.827 - 2.864) | 0.010<br>(-0.018 to 0.038)  | 0.48   | 1.003<br>(0.994 to 1.013) | 0.48   |
| 4                     | 3.746<br>(3.714 - 3.777) | 3.719<br>(3.691 - 3.748) | 0.026<br>(-0.016 to 0.068)  | 0.23   | 1.007<br>(0.996 to 1.019) | 0.23   |
| 5                     | 4.615<br>(4.570 - 4.659) | 4.565<br>(4.525 - 4.604) | 0.050<br>(-0.010 to 0.109)  | 0.10   | 1.011<br>(0.988 to 1.024) | 0.10   |

**B. Stratified by single-centre versus multicentre studies**

| Time/ years                  | RMST                     |                          | RMST difference            | p    | RMST ratio                | p    |
|------------------------------|--------------------------|--------------------------|----------------------------|------|---------------------------|------|
|                              | Tenofovir                | Entecavir                |                            |      |                           |      |
| <i>Single centre studies</i> |                          |                          |                            |      |                           |      |
| 1                            | 0.996<br>(0.994- 0.998)  | 0.996<br>(0.994- 0.998)  | 0.000<br>(-0.003 to 0.002) | 0.87 | 1.000<br>(0.997 to 1.002) | 0.87 |
| 2                            | 1.981<br>(1.976 - 1.986) | 1.977<br>(1.972 - 1.982) | 0.004<br>(-0.003 to 0.011) | 0.26 | 1.002<br>(0.999 to 1.006) | 0.26 |
| 3                            | 2.948<br>(2.938 - 2.958) | 2.937<br>(2.927 - 2.947) | 0.011<br>(-0.003 to 0.026) | 0.12 | 1.004<br>(0.999 to 1.009) | 0.12 |
| 4                            | 3.898<br>(3.881 - 3.915) | 3.874<br>(3.858 - 3.891) | 0.023<br>(0.000 to 0.047)  | 0.05 | 1.006<br>(1.000 to 1.012) | 0.05 |
| 5                            | 4.836<br>(4.810 - 4.861) | 4.794<br>(4.770 - 4.818) | 0.042<br>(0.006 to 0.077)  | 0.02 | 1.009<br>(1.001 to 1.016) | 0.02 |
| <i>Multicentre studies</i>   |                          |                          |                            |      |                           |      |
| 1                            | 0.996<br>(0.994 - 0.997) | 0.994<br>(0.993 - 0.995) | 0.002<br>(0.000 to 0.003)  | 0.07 | 1.002<br>(1.000 to 1.003) | 0.07 |
| 2                            | 1.973<br>(1.969 - 1.977) | 1.967<br>(1.963 - 1.971) | 0.006<br>(0.000 to 0.012)  | 0.05 | 1.003<br>(1.000 to 1.006) | 0.05 |
| 3                            | 2.928<br>(2.920 - 2.937) | 2.920<br>(2.912 - 2.982) | 0.008<br>(-0.004 to 0.020) | 0.18 | 1.003<br>(0.999 to 1.007) | 0.18 |
| 4                            | 3.866<br>(3.852 - 3.880) | 3.849<br>(3.837 - 3.862) | 0.017<br>(-0.002 to 0.036) | 0.09 | 1.004<br>(0.999 to 1.009) | 0.09 |
| 5                            | 4.785<br>(4.765 - 4.806) | 4.758<br>(4.739 - 4.776) | 0.028<br>(0.000 to 0.056)  | 0.05 | 1.006<br>(1.000 to 1.012) | 0.05 |



C. In studies with treatment naïve patients only

| Time/ years            | RMST                     |                          | RMST difference            | p      | RMST ratio                | p      |
|------------------------|--------------------------|--------------------------|----------------------------|--------|---------------------------|--------|
|                        | Tenofovir                | Entecavir                |                            |        |                           |        |
| <i>Clinical cohort</i> |                          |                          |                            |        |                           |        |
| 1                      | 0.997<br>(0.996 - 0.998) | 0.996<br>(0.995 - 0.997) | 0.001<br>(-0.001 to 0.002) | 0.29   | 1.001<br>(0.999 to 1.002) | 0.29   |
| 2                      | 1.980<br>(1.976 - 1.983) | 1.973<br>(1.969 - 1.977) | 0.007<br>(0.002 to 0.012)  | 0.01   | 1.003<br>(1.001 to 1.006) | 0.01   |
| 3                      | 2.943<br>(2.936 - 2.950) | 2.927<br>(2.919 - 2.935) | 0.016<br>(0.005 to 0.027)  | 0.004  | 1.005<br>(1.002 to 1.009) | 0.004  |
| 4                      | 3.889<br>(3.877 - 3.901) | 3.858<br>(3.845 - 3.871) | 0.031<br>(0.013 to 0.049)  | <0.001 | 1.008<br>(1.003 to 1.013) | <0.001 |
| 5                      | 4.817<br>(4.799 - 4.836) | 4.769<br>(4.750 - 4.788) | 0.049<br>(0.022 to 0.075)  | <0.001 | 1.010<br>(1.005 to 1.016) | <0.001 |

**eFigure 3.** Cumulative Incidence of HCC in Patients Receiving Tenofovir vs Entecavir in Patients With Cirrhosis Only

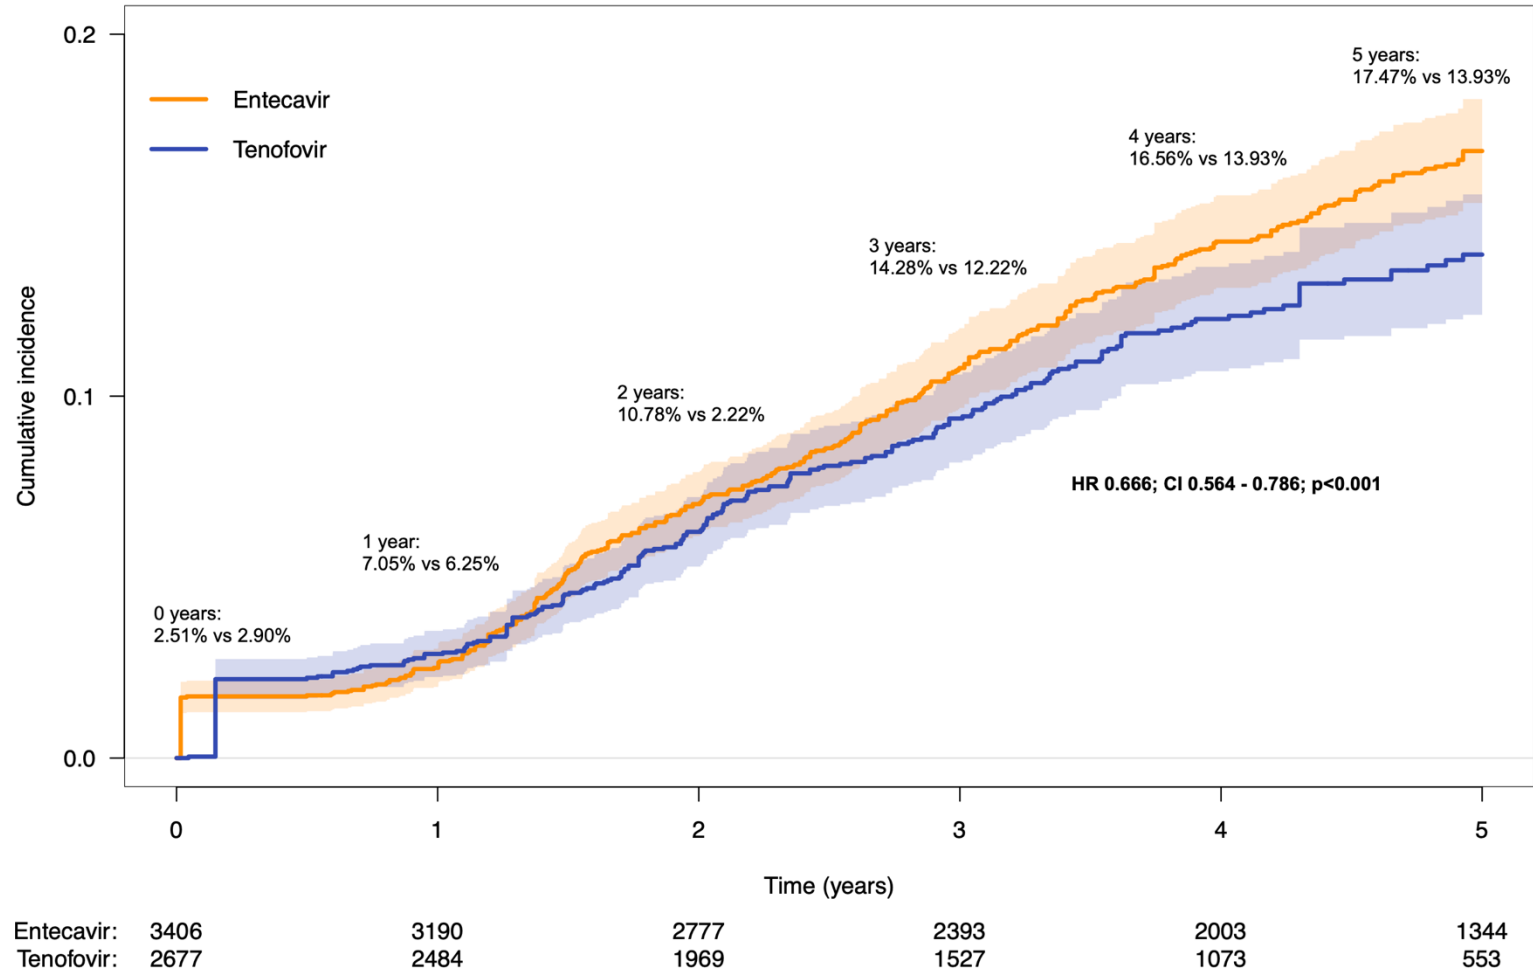

eFigure 4. Cumulative Incidence of HCC in Patients Receiving Tenofovir vs Entecavir in (A) Single Centre Studies and in (B) Multicentre Studies

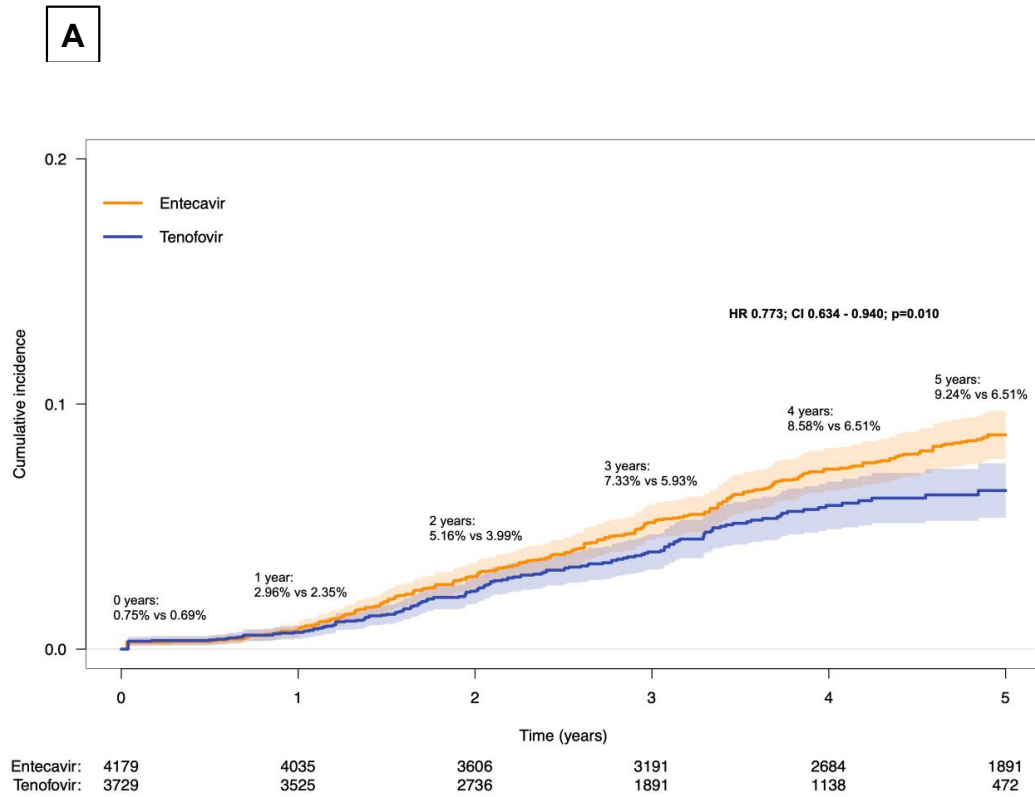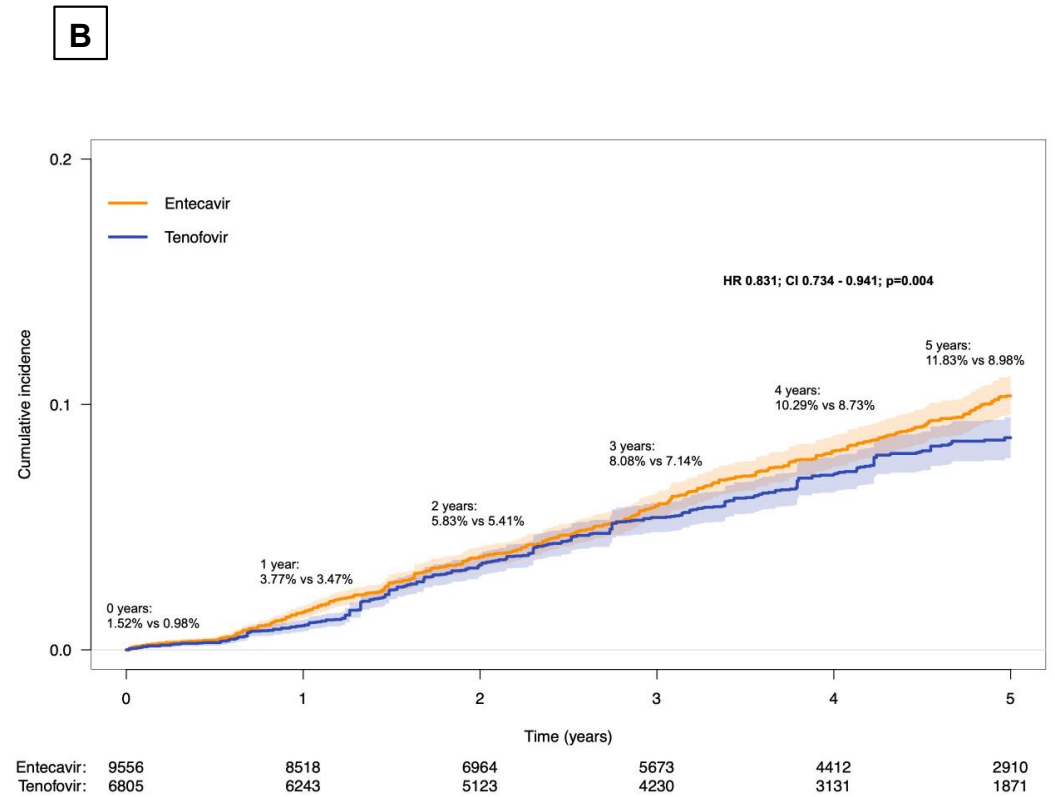

eFigure 5. Cumulative Incidence of HCC in Patients Receiving Tenofovir vs Entecavir in Studies Involving Treatment-Naïve Patients Only

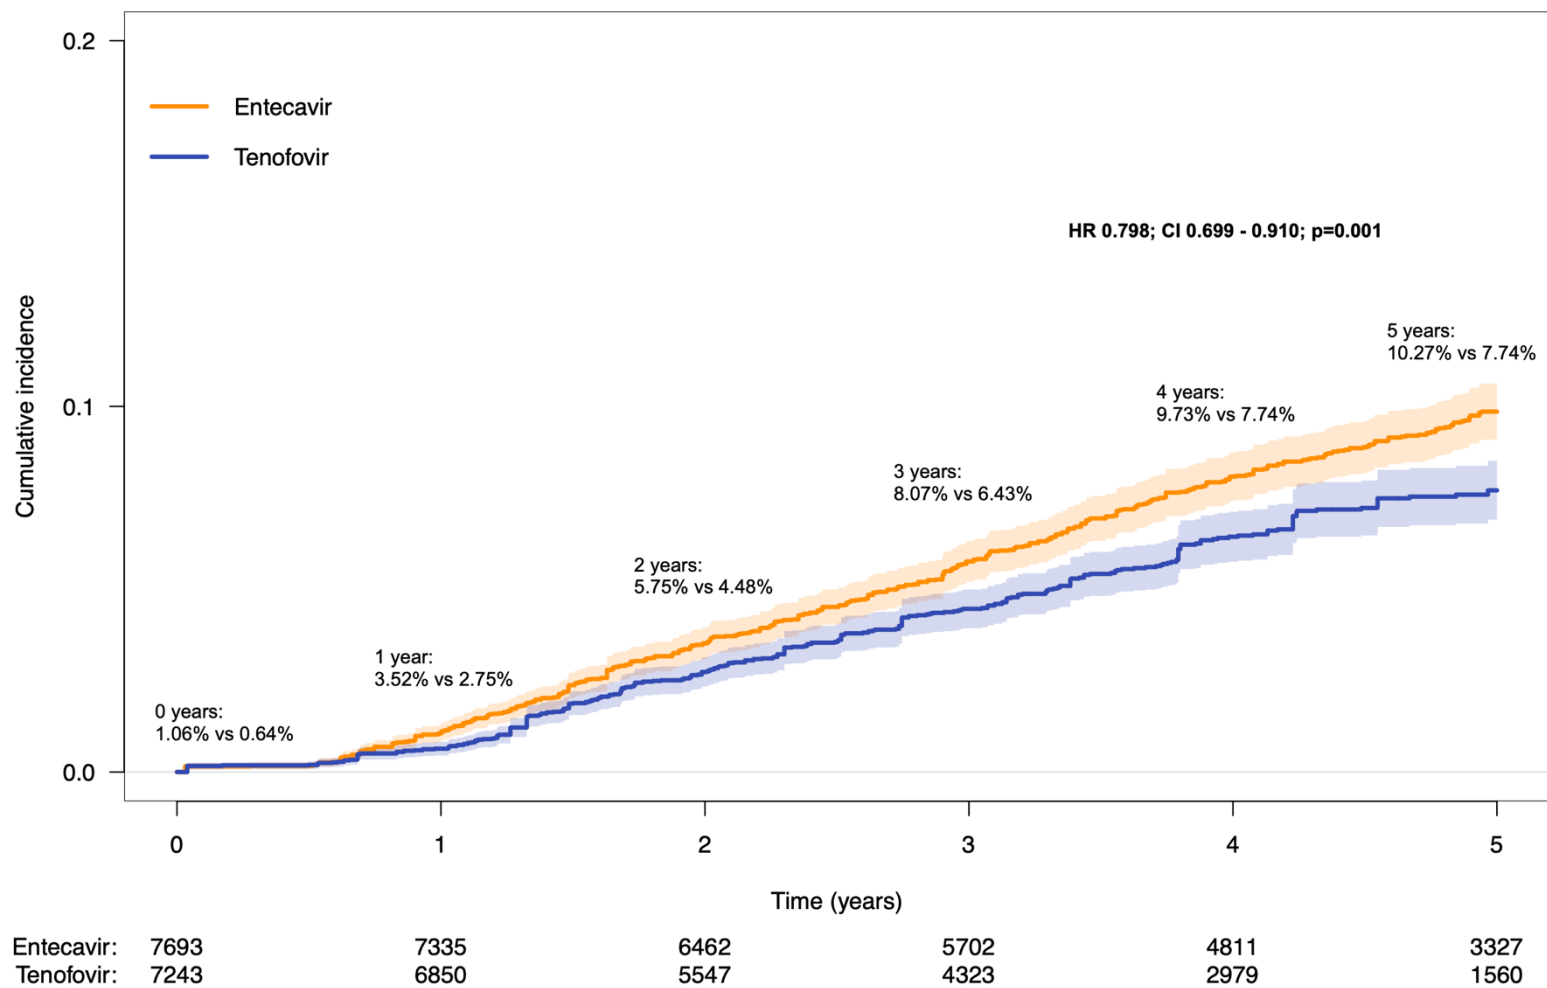

## References.

1. Hsu YC, Wong GLH, Chen CH, et al. Tenofovir Versus Entecavir for Hepatocellular Carcinoma Prevention in an International Consortium of Chronic Hepatitis B. *The American journal of gastroenterology*. 2020;115(2):271-280.
2. Choi J, Kim HJ, Lee J, Cho S, Ko MJ, Lim YS. Risk of Hepatocellular Carcinoma in Patients Treated with Entecavir vs Tenofovir for Chronic Hepatitis B: A Korean Nationwide Cohort Study. *JAMA Oncology*. 2019;5(1):30-36.
3. Kim SU, Seo YS, Lee HA, et al. A multicenter study of entecavir vs. tenofovir on prognosis of treatment-naïve chronic hepatitis B in South Korea. *Journal of Hepatology*. 2019;71(3):456-464.
4. Lee SW, Kwon JH, Lee HL, et al. Comparison of tenofovir and entecavir on the risk of hepatocellular carcinoma and mortality in treatment-naïve patients with chronic hepatitis B in Korea: A large-scale, propensity score analysis. *Gut*. 2020;69(7):1301-1308.
5. Ha I, Chung JW, Jang ES, Jeong SH, Kim JW. Comparison of the on-treatment risks for hepatocellular carcinoma between entecavir and tenofovir: A propensity score matching analysis. *Journal of Gastroenterology and Hepatology (Australia)*. 2020;35(10):1774-1781.
6. Kim BG, Park NH, Lee SB, et al. Mortality, liver transplantation and hepatic complications in patients with treatment-naïve chronic hepatitis B treated with entecavir vs tenofovir. *Journal of Viral Hepatitis*. 2018;25(12):1565-1575.
7. Oh H, Yoon EL, Jun DW, et al. No Difference in Incidence of Hepatocellular Carcinoma in Patients With Chronic Hepatitis B Virus Infection Treated With Entecavir vs Tenofovir. *Clinical Gastroenterology and Hepatology*. 2020;18(12):2793-2802.e2796.
8. Yip TCF, Wong VWS, Chan HLY, Tse YK, Lui GCY, Wong GLH. Tenofovir Is Associated With Lower Risk of Hepatocellular Carcinoma Than Entecavir in Patients With Chronic HBV Infection in China. *Gastroenterology*. 2020;158(1):215-225.e216.
9. Shin JW, Jeong J, Jung SW, et al. Comparable Incidence of Hepatocellular Carcinoma in Chronic Hepatitis B Patients Treated with Entecavir or Tenofovir. *Digestive Diseases and Sciences*. 2021;66(5):1739-1750.
10. Chen CH, Chen CY, Wang JH, et al. Comparison of incidence of hepatocellular carcinoma between chronic hepatitis B patients with cirrhosis treated with entecavir or tenofovir in Taiwan - A retrospective study. *American Journal of Cancer Research*. 2020;10(11):3882-3895.
11. Hu TH, Yueh-Hsia Chiu S, Tseng PL, et al. Five-year comparative risk of hepatocellular carcinoma development under entecavir or tenofovir treatment-naïve patients with chronic hepatitis B-related compensated cirrhosis in Taiwan. *Alimentary Pharmacology and Therapeutics*. 2020;52(11-12):1695-1706.
12. Ha Y, Chon YE, Kim MN, Lee JH, Hwang SG. Hepatocellular carcinoma and death and transplantation in chronic hepatitis B treated with entecavir or tenofovir disoproxil fumarate. *Scientific reports*. 2020;10(1):13537.
13. Chang TS, Yang YH, Chen WM, et al. Long-term risk of primary liver cancers in entecavir versus tenofovir treatment for chronic hepatitis B. *Scientific reports*. 2021;11(1):1365.

14. Su F, Berry K, Ioannou GN. No difference in hepatocellular carcinoma risk between chronic hepatitis B patients treated with entecavir versus tenofovir. *Gut*. 2021;70(2):370-378.
